1 **Both consumptive and non-consumptive effects of predators**  
2 **impact mosquito populations and have implications for disease**  
3 **transmission**

4 Marie C. Russell<sup>a\*</sup>, Catherine M. Herzog<sup>b\*</sup>, Zachary Gajewski<sup>c</sup>, Chloe Ramsay<sup>d</sup>, Fadoua El  
5 Moustaid<sup>c</sup>, Michelle V. Evans<sup>e,f</sup>, Trishna Desai<sup>g</sup>, Nicole L. Gottdenker<sup>e,h</sup>, Sara L. Hermann<sup>i</sup>,  
6 Alison G. Power<sup>j</sup>, and Andrew C. McCall<sup>k</sup>

7

8 \*Co-first authorship; for correspondence: Marie C. Russell, [marie.clare.russell@gmail.com](mailto:marie.clare.russell@gmail.com)

9

10 <sup>a</sup>Department of Life Sciences, Imperial College London, Silwood Park Campus, Ascot, UK

11 <sup>b</sup>Center for Infectious Disease Dynamics, Pennsylvania State University, University Park,  
12 PA, USA

13 <sup>c</sup>Department of Biological Sciences, Virginia Polytechnic Institute and State University,  
14 Blacksburg, VA, USA

15 <sup>d</sup>Department of Biological Sciences, University of Notre Dame, Notre Dame, IN, USA

16 <sup>e</sup>Odum School of Ecology & Center for Ecology of Infectious Diseases, University of  
17 Georgia, Athens, GA, USA

18 <sup>f</sup>MIVEGEC, IRD, CNRS, Université Montpellier, Montpellier, France

19 <sup>g</sup>Nuffield Department of Population Health, University of Oxford, Oxford, UK

20 <sup>h</sup>Department of Veterinary Pathology, University of Georgia College of Veterinary Medicine,  
21 Athens, GA, USA

22 <sup>i</sup>Department of Entomology, Pennsylvania State University, University Park, PA, USA

23 <sup>j</sup>Department of Ecology & Evolutionary Biology, Cornell University, Ithaca, NY, USA

24 <sup>k</sup>Biology Department, Denison University, Granville, OH, USA

25 **Abstract**

26

27 Predator-prey interactions influence prey traits through both consumptive and non-  
28 consumptive effects, and variation in these traits can shape vector-borne disease dynamics.  
29 Meta-analysis methods were employed to generate predation effect sizes by different  
30 categories of predators and mosquito prey. This analysis showed that multiple families of  
31 aquatic predators are effective in consumptively reducing mosquito survival, and that the  
32 survival of *Aedes*, *Anopheles*, and *Culex* mosquitoes is negatively impacted by consumptive  
33 effects of predators. Mosquito larval size was found to play a more important role in  
34 explaining the heterogeneity of consumptive effects from predators than mosquito genus.  
35 Mosquito survival and body size were reduced by non-consumptive effects of predators, but  
36 development time was not significantly impacted. In addition, *Culex* vectors demonstrated  
37 predator avoidance behavior during oviposition. The results of this meta-analysis suggest that  
38 predators limit disease transmission by reducing both vector survival and vector size, and that  
39 associations between drought and human West Nile virus cases could be driven by the vector  
40 behavior of predator avoidance during oviposition. These findings are likely to be useful to  
41 infectious disease modelers who rely on vector traits as predictors of transmission.

42

## 43 **Introduction**

44

45 While it is well-known that predation reduces vector populations through consumptive  
46 effects, non-consumptive effects of predators can also greatly impact prey demographics  
47 (Preisser et al., 2005). Mosquitoes are vectors of a variety of debilitating and deadly diseases,  
48 including malaria, lymphatic filariasis, and arboviruses, such as chikungunya, Zika, and  
49 dengue (Weaver and Reisen, 2010, World Health Organization (WHO), 2020). Consequently,  
50 there is motivation from a public health perspective to better understand the different drivers  
51 of variation in mosquito traits that can ultimately impact vector population growth and  
52 disease transmission. In addition, recent work has suggested that incorporation of vector trait  
53 variation into disease models can improve the reliability of their predictions (Cator et al.,  
54 2020). In this study, systematic review and meta-analysis methods are used to synthesize a  
55 clearer understanding of the consumptive and non-consumptive effects of predators on  
56 mosquito traits, including survival, oviposition, development, and size.

57

58 Mosquito insecticide resistance is recognized as a growing problem (Hancock et al., 2018,  
59 Hemingway and Ranson, 2000, Liu, 2015) leading some to suggest that control efforts should  
60 rely more heavily on “non-insecticide based strategies” (Benelli et al., 2016). The  
61 consumptive effects of predators on mosquitoes have previously been harnessed for  
62 biocontrol purposes. Past biocontrol efforts have used predators such as cyclopoid copepods  
63 (Kay et al., 2002, Marten, 1990, Russell et al., 1996, Veronesi et al., 2015) and mosquitofish  
64 (Pyke, 2008, Seale, 1917) to target the mosquito’s aquatic larval stage. The strength of the  
65 consumptive effects of these predators on mosquitoes can be influenced by multiple factors,  
66 including predator-prey size ratio and temperature. Predator-prey body size ratios tend to be  
67 higher in freshwater habitats than other types of habitats (Brose et al., 2006), and attack rate

68 tends to increase with temperature (Kalinowski and DeLong, 2016, Dam and Peterson, 1988),  
69 though other studies suggest a unimodal response to temperature (Uiterwaal and DeLong,  
70 2020, Englund et al., 2011).

71

72 Predators can also have non-consumptive effects on prey (Peacor and Werner, 2001), and  
73 these effects are thought to be more pronounced in aquatic ecosystems than in terrestrial  
74 ecosystems (Preisser et al., 2005). Non-consumptive effects of predators are the result of the  
75 prey initiating anti-predator behavioral and/or physiological trait changes that can aid in  
76 predator avoidance (Hermann and Landis, 2017, Lima and Dill, 1990). Such plasticity in  
77 certain prey traits may also result in energetic costs (Lima, 1998). Predator detection is key  
78 for these trait changes to occur and can be mediated by chemical, tactile, and visual cues  
79 (Hermann and Thaler, 2014). In mosquitoes, exposure to predators is known to affect a  
80 variety of traits including behavior, size, development, and survival (Arav and Blaustein,  
81 2006, Bond et al., 2005, Roberts, 2012, Roux et al., 2015, Zuharah et al., 2013). Experimental  
82 observations of predator effects on mosquito size and development are inconsistent and  
83 results sometimes vary by mosquito sex. For example, exposure to predation was found to  
84 increase the size of *Culex pipiens* mosquitoes (Alcalay et al., 2018) but decrease the size of  
85 *Culiseta longiareolata* (Stav et al., 2005). In addition, female *Aedes triseriatus* exhibited  
86 shorter development times when exposed to predation at high nutrient availability (Ower and  
87 Juliano, 2019), but male *C. longiareolata* had longer development times in the presence of  
88 predators (Stav et al., 2005). In some cases, a shared evolutionary history between predator  
89 and prey organisms can strengthen the non-consumptive effects of predators on mosquitoes  
90 (Buchanan et al., 2017, Sih, 1986).

91

92 This investigation assesses the consumptive and non-consumptive effects of predators on  
93 mosquito traits and describes how these effects could impact disease transmission. The roles  
94 of vector genus, predator family, mosquito larval instar (an indicator of prey size), and  
95 temperature are also examined as potential moderators of predator effects. Non-consumptive  
96 effects of predators are expected to cause a smaller reduction in mosquito survival than  
97 consumptive effects because, in practice, measures of consumptive effects always include  
98 both consumptive and non-consumptive effects. Based on previous findings, larger predators  
99 are more likely to consumptively reduce mosquito survival (Kumar et al., 2008). In addition,  
100 *Aedes* mosquito larvae may be more vulnerable to consumptive predation than other genera  
101 because of the high degree of motility observed in this genus (Dieng et al., 2003, Marten and  
102 Reid, 2007, Soumare and Cilek, 2011). The oviposition response to predation is expected to  
103 be weakest among *Aedes* species that oviposit above the water line, due in part to their  
104 delayed-hatching eggs (Vonesh and Blaustein, 2010). Predation is predicted to reduce  
105 mosquito size and lengthen development time, consistent with the reduced growth response  
106 observed in other insect systems (Hermann and Landis, 2017). Certain non-consumptive  
107 effects of predation, particularly oviposition site selection and decreased vector size, are  
108 likely to play important roles in the dynamics of mosquito-borne disease.

109

## 110 **Materials and Methods**

111

### 112 Literature Screening:

113 A systematic search was conducted for studies on predation of mosquitoes that were  
114 published between 1970 and July 1, 2019 using both PubMed® and Web of Science™ search  
115 engines, according to the PRISMA protocol (Moher et al., 2009). Mosquito vectors of the  
116 *Anopheles* and *Aedes* genera were specifically highlighted in our search terms because these

117 genera contain the vector species that transmit malaria, yellow fever, and dengue – the three  
118 most deadly mosquito-borne diseases worldwide (Hill et al., 2005). Searches included 18  
119 combinations of three vector predation terms (mosquito predat\*, *Anopheles* predat\*, *Aedes*  
120 predat\*) and six trait terms (survival, mortality, development, fecundity, dispers\*, host  
121 preference). Abstracts from the 1,136 studies were each screened by two different co-authors,  
122 using the “metagear” package in R (Lajeunesse, 2016, R Core Team, 2020). If either screener  
123 thought the study had information relevant to predation of mosquitoes, or both screeners  
124 thought the abstract was ambiguous, the study was read in full. This resulted in 306 studies  
125 that were fully reviewed to determine if any predation data could be extracted (Fig 1).

126

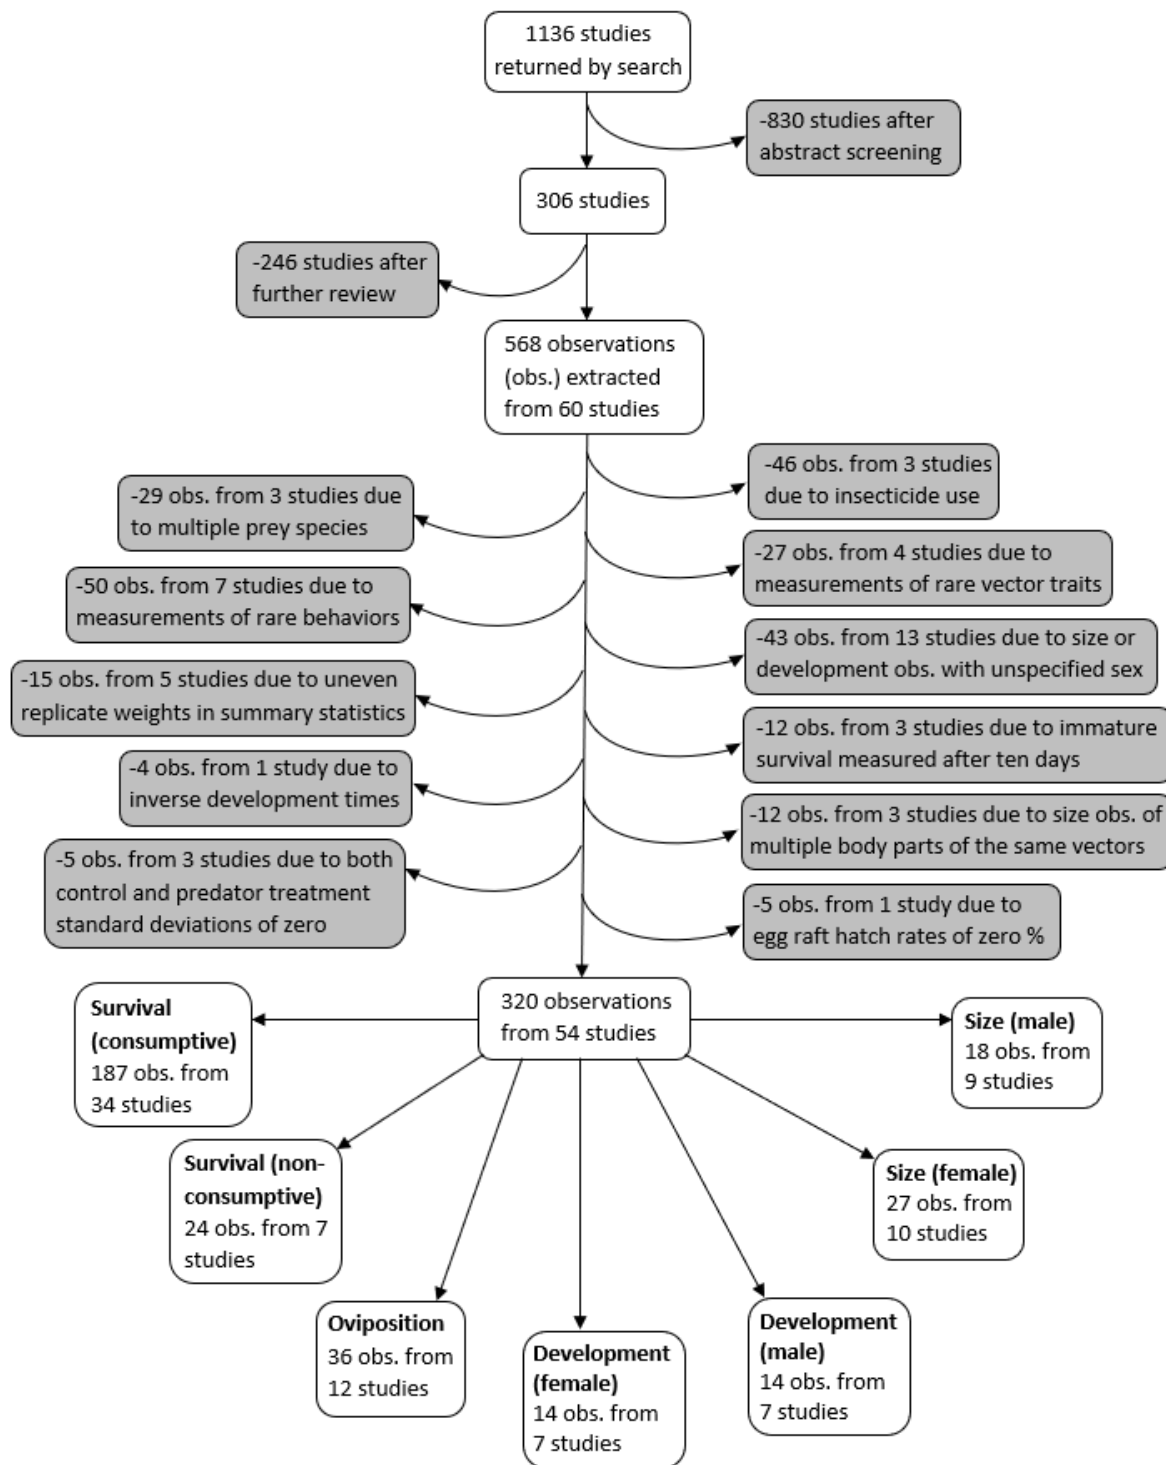

127

128

**Fig 1.** Flowchart demonstrating the literature search, screening process, data exclusions, and the resulting seven different vector trait data subsets

129

130 Study Exclusion Criteria:

131 Data were extracted from studies that collected data on non-consumptive and/or consumptive  
132 effects of predators on mosquitoes. Studies were required to have a mean, error measurement,  
133 and at least two replicates for both control and predator treatments. The control treatment was  
134 required to have all the same conditions as the predator treatment, such as prey density and  
135 type of water, without the predators. Studies that were not published in English and studies  
136 that did not differentiate between predators of multiple families were excluded. Studies were  
137 also excluded if oviposition by free-flying female mosquitoes could have interfered with  
138 observing the consumptive effects of predators on vector survival. The final database  
139 comprised data extracted from 60 studies (Table S1). The data included observations from  
140 laboratory experiments, as well as semi-field experiments, in which mesocosms of different  
141 treatments were observed in outdoor settings.

142

143 Data Extraction:

144 Variables related to the publication, the vector, the predator, and the effect size (Table 1)  
145 were extracted from each study. Data from tables and text were recorded as they were  
146 published, and data from figures were extracted using WebPlotDigitizer (Rohatgi, 2020).  
147 Error measurements that were not originally presented as standard deviations were converted  
148 to standard deviations prior to the effect size calculation.

149



150 Table 1: Variables extracted from included studies  
151

| Variable                                                                                                                                                                                                             | Description                                                                                                                                                                                                                                                                                                                                                                                                                                                                                                                                       |
|----------------------------------------------------------------------------------------------------------------------------------------------------------------------------------------------------------------------|---------------------------------------------------------------------------------------------------------------------------------------------------------------------------------------------------------------------------------------------------------------------------------------------------------------------------------------------------------------------------------------------------------------------------------------------------------------------------------------------------------------------------------------------------|
| <b>Publication data:</b><br>Title<br>Journal<br>Year<br>Study environment                                                                                                                                            | Full study title<br>Name of journal that published the study<br>Year of publication<br>Environment where the experiment took place: lab or semi-field                                                                                                                                                                                                                                                                                                                                                                                             |
| <b>Vector data:</b><br>Order, Family, Genus, Species<br>Trait<br>Stage<br>Larval instar<br>Sex                                                                                                                       | Taxonomic identification<br>Outcome that was measured (e.g., survival, development, etc.)<br>Life stage: egg, larva, pupa, or adult<br>Early (1 <sup>st</sup> and 2 <sup>nd</sup> instars), late (3 <sup>rd</sup> and 4 <sup>th</sup> instars), both, or NA (eggs, pupae, or adults)<br>Male or female                                                                                                                                                                                                                                            |
| <b>Predator data:</b><br>Phylum, Class, Order, Family, Genus, Species<br>Starved<br>Time starved<br>Predation effect                                                                                                 | Taxonomic identification<br>Whether the predator was starved: yes or no<br>Amount of time that the predator was starved (in minutes)<br>Consumptive or non-consumptive                                                                                                                                                                                                                                                                                                                                                                            |
| <b>Effect size data:</b><br>Units<br>Control mean<br>Control standard deviation<br>Control number of replicates<br>Predation mean<br>Predation standard deviation<br>Predation number of replicates<br>Experiment ID | Units of extracted data<br>Average of the outcome measured among the controls<br>Standard deviation of the outcome measured in the controls<br>Number of control replicates<br>Average of the outcome measured in the predator treatment<br>Standard deviation of the outcome measured in the predator treatment<br>Number of predation replicates<br>Alphabetic assignment to mark observations sharing a control group or representing the same prey individuals as originating from the same experiment                                        |
| <b>Additional data:</b><br>Experiment time (days)<br>Data source<br>Number of predators<br>Number of prey (vectors)<br>Arena volume (mL)<br>Time exposed to predator(s)<br>Temperature (°C)<br>Type of predator cue  | Duration of the experiment in days<br>Graph or text<br>Number of predators with access to prey, or “cue” if there are no predators with direct access to prey<br>Number of mosquito prey that are exposed to predation<br>Volume of the arena where prey encounter predators<br>Amount of time (in days) when the predator has direct access to the mosquito prey<br>Temperature during the predation interaction<br>Predator cues, or cues from both predator(s) and dying conspecifics; NA for observations with a consumptive predation effect |

152 Data Exclusions:

153 A PRISMA plot of literature inclusion and exclusion is provided in Figure 1. Observations  
154 where insecticide was used were excluded because insecticides are known to interfere with  
155 consumptive and non-consumptive effects of predators (Delnat et al., 2019, Janssens and  
156 Stoks, 2012). In addition, observations from experiments with mosquito prey of two or more  
157 species were excluded because it was not possible to account for effects from apparent  
158 competition or prey-switching. Observations of vector fecundity, vector competence,  
159 behavioral traits other than oviposition, as well as observations where the vector trait was  
160 marked as “other” were not analyzed because each of these traits were only recorded from  
161 three or fewer studies.

162

163 Due to protandry, the earlier emergence of males to maximize their reproductive success,  
164 mosquitoes respond to sex-specific selective forces that influence their development time and  
165 body size (Kleckner et al., 1995). Under low resource conditions, female mosquitoes are  
166 likely to maximize body mass by extending their development time, whereas males tend to  
167 minimize their development time at the expense of lower body mass (Kleckner et al., 1995).  
168 Observations of mosquito development time and body size in our database that were not sex-  
169 specific were excluded so that these vector traits could be analyzed while controlling for sex.  
170 In addition, some size and development time predator means did not necessarily represent an  
171 evenly weighted average of the replicates. For example, if a total of twenty mosquitoes from  
172 three different predator replicates survived to adulthood, the mean size and development time  
173 of those twenty individuals may have been reported. To represent an evenly weighted average  
174 of the replicates, it is necessary to first calculate summary statistics among multiple  
175 individuals that emerge from the same replicate, and then report the average of the replicate-

176 specific means. Observations that might have been influenced by uneven representation of  
177 replicates were excluded to prevent pseudo-replication from altering later meta-analyses.

178

179 For consumptive observations where life stage-specific survival was reported after more than  
180 10 days of predator exposure, only data on survival marked by adult emergence were  
181 included for analysis. Effects observed among immature vector stages after such a long  
182 period of predator exposure were not analyzed because they could have resulted from a  
183 combination of non-consumptive effects on development, and consumptive effects on  
184 survival. Development time observations that were reported as the inverse of development  
185 time (units of days<sup>-1</sup>) were excluded because although their means could be converted to units  
186 of days, their standard deviations could not be converted to match units of days. In cases  
187 where multiple body sections of the same mosquitoes were measured to produce multiple size  
188 observations, only the wing measurement was included in the analysis to prevent pseudo-  
189 replication. Observations in which both the control and the predator treatments had standard  
190 deviations of zero were excluded because the meta-analysis methods did not support non-  
191 positive sampling variances.

192

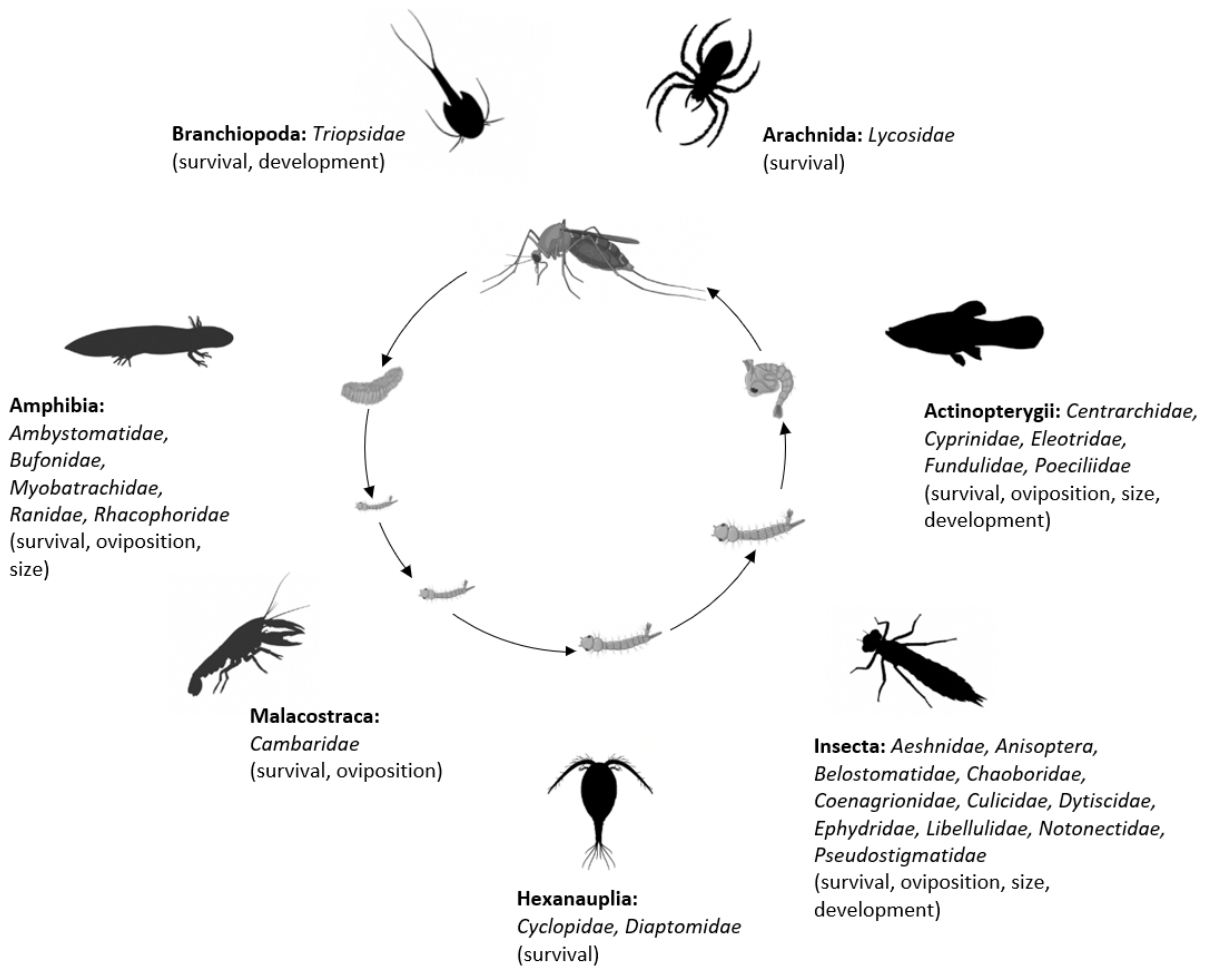

193

**Fig 2.** Mosquito predator classes (bold font) and families (italicized font) included in the database and the vector traits that they may influence (in parentheses); predator images not to scale, and placed randomly with respect to the different mosquito life stages

Image sources:

phylopic.org (CC BY 3.0 or public domain): Actinopterygii (creator: Milton Tan), Arachnida (creators: Sidney Frederic Harmer & Arthur Everett Shipley, vectorized by Maxime Dahirel), Branchiopoda (creator: Africa Gomez), and Insecta (creator: Marie Russell)

BioRender.com: Amphibia, Hexanauplia, and Malacostraca class silhouettes; mosquito larval instars, pupa, and blood-feeding adult

Trishna Desai: mosquito egg raft

194

195 Exclusions and Data Substitutions for Predator Treatment Means of Zero:

196 One study that was included in our database reported egg survival data as the hatch rate of  
197 field collected *Culex pervigilans* rafts (Zuharah et al., 2013). However, mosquitoes have been  
198 shown to lay eggs independent of mating (O'Meara, 1979), and hatch rates of zero have  
199 previously been observed in rafts laid by *Culex* females that were held separately from males  
200 (Su and Mulla, 1997). Thus, hatch rates of zero were excluded from further analysis because  
201 these values may represent unfertilized egg rafts, rather than a strong impact of predators on  
202 survival. Twenty of the 187 consumptive survival observations had a predation mean of zero,  
203 and each of these zeros resulted from experiments that began with a specified number of live  
204 larvae. Consumptive survival zeros were each replaced with 0.5% of the starting number of  
205 mosquito prey to avoid undefined effect sizes. In addition, there was one zero out of the 36  
206 oviposition predation means; this value had units of “number of egg rafts laid” and was  
207 replaced with 0.5 rafts. Similar methods for replacing zero values in the treatment mean with  
208 small non-zero values have previously been employed (Thapa et al., 2018).

209

210 The final analysis dataset included seven subsets: consumptive effects on survival, non-  
211 consumptive effects on survival, oviposition, development (female and male), and size  
212 (female and male). The data included 187 observations from 34 studies of consumptive  
213 survival, 24 observations from seven studies of non-consumptive survival, 36 observations  
214 from 12 studies of oviposition, 14 observations from seven studies of female development, 14  
215 observations from seven studies of male development, 27 observations from 10 studies of  
216 female size, and 18 observations from nine studies of male size (Fig 1). These observations  
217 covered seven different classes of predator families (Fig 2).

218

219

220 Data Analysis:

221

222 *Measuring Effect Sizes and Heterogeneity*

223 All analyses were conducted in R version 4.0.2 (R Core Team, 2020). For each subset of trait  
224 data (Fig 1), the ratio of means (ROM) measure of effect size was calculated using the  
225 “escalc” function from the “metafor” package; this effect measure is equal to a log-  
226 transformed fraction, where predation mean is the numerator and control mean is the  
227 denominator (Viechtbauer, 2010). Random effects models, using the “rma.uni” function,  
228 were run with the ROM effect sizes as response variables; each model had a normal error  
229 distribution and a restricted maximum likelihood (REML) estimator for  $\tau^2$ , the variance of the  
230 distribution of true effect sizes (Viechtbauer, 2010). Although these random effects models  
231 could not account for multiple random effects or moderators, they provided overall estimates  
232 of the ROM effect sizes and estimates of the  $I^2$  statistics. Each  $I^2$  statistic represented the  
233 percentage of total variation across studies due to heterogeneity (Higgins et al., 2003). If the  
234  $I^2$  statistic was equal to or greater than 75%, the heterogeneity was considered to be high  
235 (Higgins et al., 2003), and high heterogeneity has previously motivated further testing of  
236 moderators (Vincze et al., 2017).

237

238 *Assessing Publication Bias*

239 Publication bias was assessed by visually inspecting funnel plots and conducting Egger’s  
240 regression test (“regtest” function) with standard error as the predictor (Sterne and Egger,  
241 2001, Viechtbauer, 2010). If the Egger’s regression test showed significant evidence of  
242 publication bias based on funnel plot asymmetry, the “trim and fill” method (“trimfill”  
243 function) was used to estimate how the predation effect size might change after imputing  
244 values from missing studies (Duval and Tweedie, 2000b, Duval and Tweedie, 2000a,

245 Viechtbauer, 2010). The trim and fill method has previously been recommended for testing  
246 the robustness of conclusions related to topics in ecology and evolution (Jennions and Moller,  
247 2002). Of the two trim and fill estimators,  $R_0$  and  $L_0$ , that were originally recommended  
248 (Duval and Tweedie, 2000b, Duval and Tweedie, 2000a), the  $L_0$  estimator was used in this  
249 study because it is more appropriate for smaller datasets (Shi and Lin, 2019).

250

### 251 *Testing Moderators*

252 Data subsets that had high heterogeneity, observations from at least 10 studies, and no  
253 evidence of publication bias according to Egger's regression results were analyzed further  
254 using multilevel mixed effects models with the "rma.mv" function (Viechtbauer, 2010,  
255 Higgins et al., 2020). All multilevel mixed effects models had normal error distributions,  
256 REML estimators for  $\tau^2$ , and accounted for two random factors: effect size ID, and  
257 experiment ID nested within study ID. Moderators, such as predator family, vector genus,  
258 larval instar (directly correlated to prey size), and temperature, were tested within each data  
259 subset to determine if they affected the observed heterogeneity in ROM effect sizes. For  
260 categorical moderators, the intercept of the multilevel mixed effects model was removed,  
261 allowing an analysis of variance (ANOVA) referred to as the "test of moderators" to indicate  
262 if any of the categories had an effect size different than zero. For data subsets with  
263 observations from 10 to 29 studies, only one moderator was tested at a time to account for  
264 sample size constraints. For subsets with observations from a higher number of studies (30 or  
265 more), up to two moderators were tested at once, and interaction between moderators was  
266 also tested. The small sample corrected Akaike Information Criterion (AICc) was used to  
267 compare multilevel mixed effects models and to select the model of best fit within each data  
268 subset; differences in AICc greater than two were considered meaningful (Burnham and  
269 Anderson, 2004).

270 Both the database and the R code file showing all analyses will be made publicly accessible  
271 from the Dryad Digital Repository.

272

## 273 **Results**

274

275 Random Effects Models:

276 Each data subset (Fig 1) had an  $I^2$  statistic of greater than 75%, indicating high heterogeneity

277 (Higgins et al., 2003). Random effects model results showed that predators consumptively

278 decreased mosquito survival with an effect size of -1.23 (95% CI -1.43, -1.03), p-value

279 <0.0001, and non-consumptively reduced survival with a smaller effect size of -0.11 (95% CI

280 -0.17, -0.04), p-value = 0.0016. In addition, predators non-consumptively reduced oviposition

281 behavior with an effect size of -0.87 (95% CI -1.31, -0.42), p-value = 0.0001, and mosquito

282 body size was non-consumptively reduced by predators in both males and females; the

283 female effect size was -0.13 (95% CI -0.19, -0.06), p-value = 0.0002, and the male effect size

284 was -0.03 (95% CI -0.06, -0.01), p-value = 0.0184. There was not a significant non-

285 consumptive effect of predators on either male or female development time; the female effect

286 size was -0.01 (95% CI -0.09, 0.07), p-value = 0.7901, and the male effect size was -0.04

287 (95% CI -0.12, 0.04), p-value = 0.3273.

288

289 The Egger's regression test results showed that the non-consumptive survival subset, both

290 development time subsets (male and female), and the female size subset exhibited funnel plot

291 asymmetry indicative of publication bias. The "trim and fill" procedure identified missing

292 studies in the non-consumptive survival subset and the female size subset, but the procedure

293 did not identify any missing studies in either of the development time subsets. Three studies

294 were estimated to be missing from the non-consumptive survival data, and accounting for



295 imputed values from missing studies resulted in a shift in the predation effect size from -0.11  
296 (95% CI -0.17, -0.04), p-value = 0.0016, to -0.13 (95% CI -0.20, -0.07), p-value <0.0001.

297 Two studies were estimated to be missing from the female size data, and accounting for  
298 imputed values from these missing studies shifted the predation effect size from -0.13 (95%  
299 CI -0.19, -0.06), p-value = 0.0002, to -0.10 (95% CI -0.17, -0.03), p-value = 0.0083. Shifts in  
300 effect size estimates due to the trim and fill procedure were minor and did not cause any of  
301 the observed effects of predators to change direction or become insignificant.

302

303 Table 2: Candidate multilevel mixed effects models of consumptive effects from predators on  
304 mosquito survival, fitted to dataset of effect sizes (n = 187 from 34 studies), and ranked by  
305 corrected Akaike's information criterion (AICc).

306

| <b>Moderator(s)</b>            | <b>Test of Moderators<br/>(degrees of freedom, p-value)</b> | <b>AICc</b> | <b>ΔAICc</b> |
|--------------------------------|-------------------------------------------------------------|-------------|--------------|
| predator family x vector genus | 28, <0.0001                                                 | 500.5       | 0            |
| predator family                | 19, <0.0001                                                 | 507.0       | 6.5          |
| predator family + vector genus | 23, <0.0001                                                 | 508.1       | 7.6          |
| vector genus                   | 5, <0.0001                                                  | 573.0       | 72.5         |
| none                           | ----                                                        | 576.5       | 76.0         |

307

308

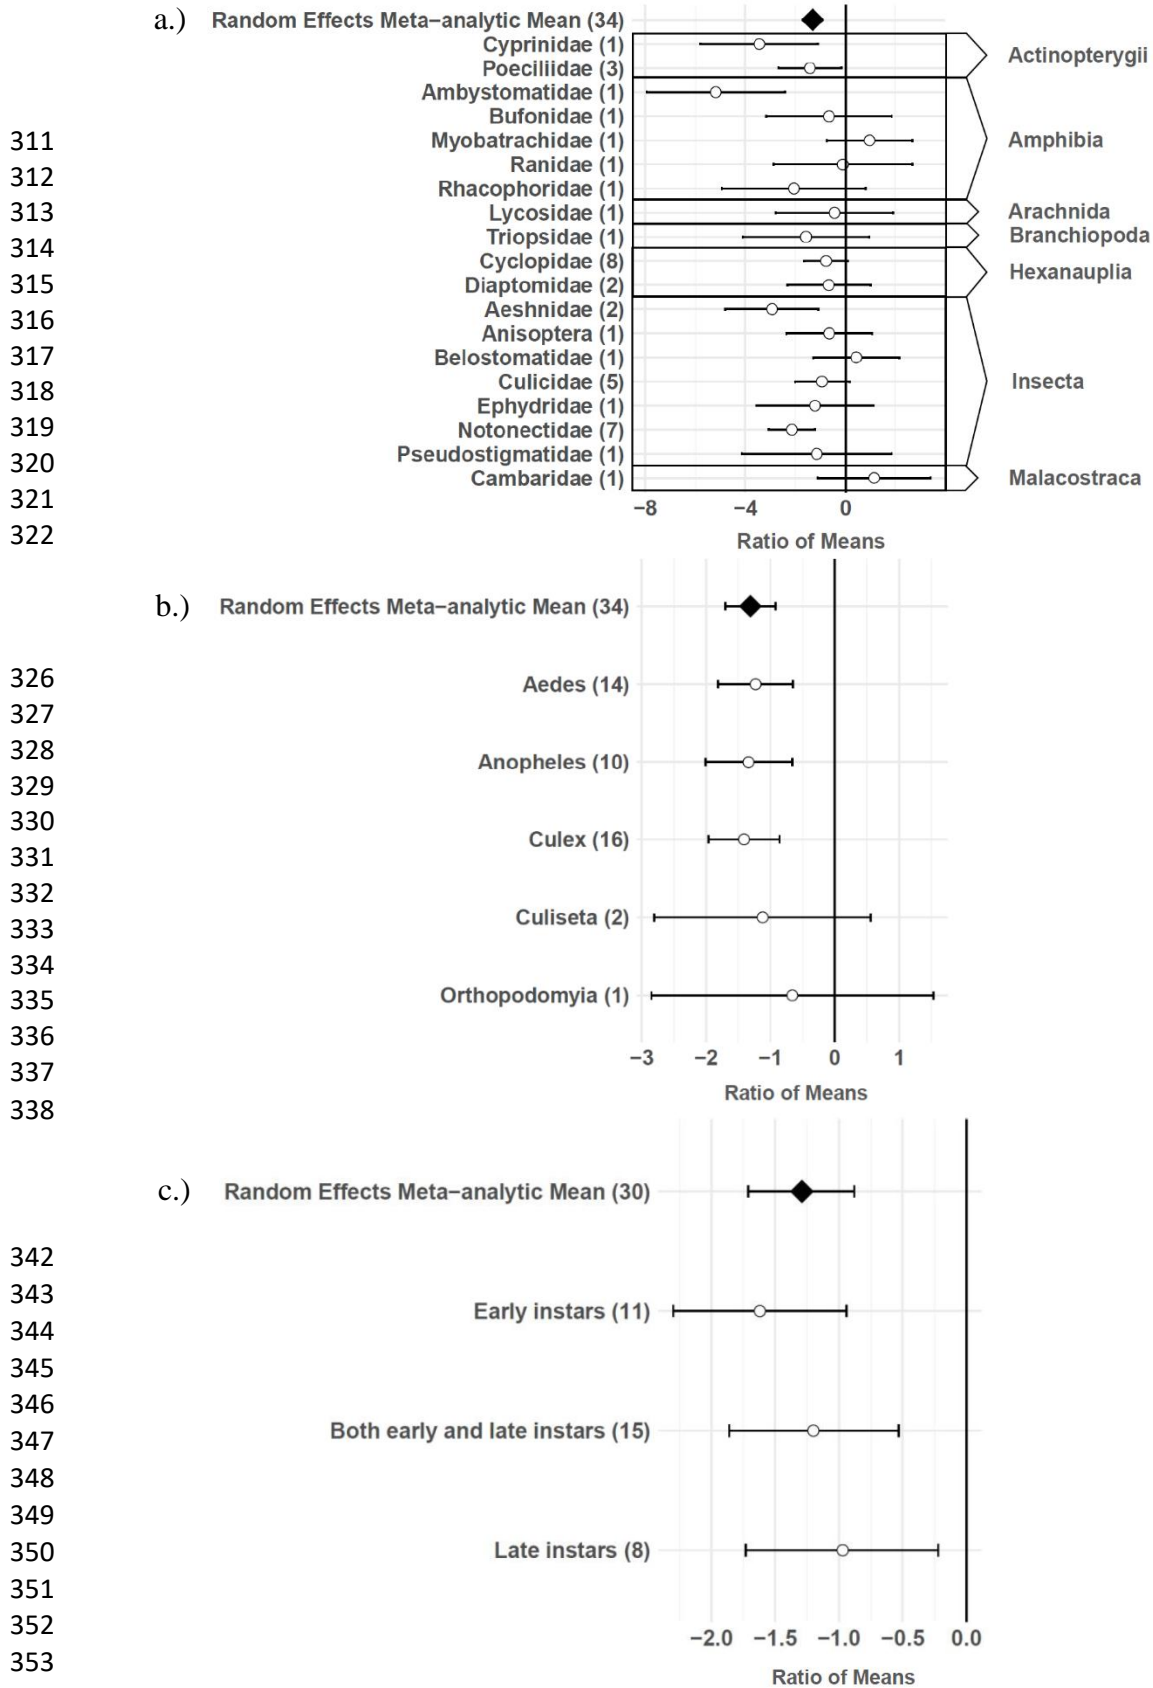

**Fig 3.** Effect sizes and 95% confidence intervals for consumptive effects of predators, for different categories of moderators (with number of studies in parentheses): a.) predator family with predator class in the right-hand column, b.) vector genus, and c.) larval instar

354 Table 3: Candidate multilevel mixed effects models of consumptive effects from predators,  
 355 fitted to dataset of effect sizes where larval instar is not missing (n = 163 from 30 studies),  
 356 and ranked by corrected Akaike's information criterion (AICc).  
 357

| Moderator(s)                    | Test of Moderators<br>(degrees of freedom, p-value) | AICc  | ΔAICc |
|---------------------------------|-----------------------------------------------------|-------|-------|
| predator family x larval instar | 25, <0.0001                                         | 429.2 | 0     |
| predator family + larval instar | 19, <0.0001                                         | 443.5 | 14.3  |
| predator family x vector genus  | 25, <0.0001                                         | 455.0 | 25.8  |
| predator family                 | 17, <0.0001                                         | 456.8 | 27.6  |
| predator family + vector genus  | 21, <0.0001                                         | 458.4 | 29.2  |
| larval instar                   | 3, <0.0001                                          | 503.1 | 73.9  |
| vector genus                    | 5, <0.0001                                          | 504.7 | 75.5  |
| none                            | ----                                                | 508.5 | 79.3  |

358

359 Multilevel Mixed Effects Models:

360 The consumptive survival and oviposition data subsets met the criteria of high heterogeneity,  
 361 observations from at least 10 studies, and no evidence of publication bias. Therefore, these  
 362 data subsets were tested for moderators using multilevel mixed effects models. Predator  
 363 families that decreased mosquito survival included Cyprinidae: -3.44 (95% CI -5.79, -1.09),  
 364 p-value = 0.0042; Poeciliidae: -1.42 (95% CI -2.67, -0.16), p-value = 0.0270;  
 365 Ambystomatidae: -5.18 (95% CI -7.94, -2.42), p-value = 0.0002; Aeshnidae: -2.93 (95% CI  
 366 -4.80, -1.07), p-value = 0.0020; and Notonectidae: -2.14 (95% CI -3.07, -1.21), p-value  
 367 <0.0001 (Fig 3a). Vector genera that experienced significant decreases in survival due to  
 368 consumptive effects of predators included *Aedes*: -1.23 (95% CI -1.81, -0.65), p-value  
 369 <0.0001; *Anopheles*: -1.34 (95% CI -2.01, -0.66), p-value = 0.0001; and *Culex*: -1.41 (95%  
 370 CI -1.96, -0.86), p-value <0.0001 (Fig 3b). Among all 187 consumptive survival observations  
 371 from 34 studies, the best model fit, according to AICc value, was achieved when an  
 372 interaction between predator family and vector genus was included in the model (Table 2).  
 373 However, among the 163 larval stage consumptive survival observations from 30 studies,  
 374 adding an interactive term between larval instar (an indicator of prey size) and predator  
 375 family had a greater improvement on model fit than adding an interactive term between

376 vector genus and predator family (Fig 3c, Table 3). Temperature did not affect the  
 377 heterogeneity of consumptive survival data, either as a linear moderator: -0.01 (95% CI -0.10,  
 378 0.07), p-value = 0.7559, or a quadratic moderator: 0.00 (95% CI 0.00, 0.00), p-value =  
 379 0.8184. The best oviposition model fit, according to AICc value, was achieved when vector  
 380 genus was added as a moderator (Table 4). The mean oviposition effect size was not  
 381 significantly different than zero for *Aedes*: 0.32 (95% CI -2.14, 2.79), p-value = 0.7970, or  
 382 *Culiseta*: -0.61 (95% CI -1.83, 0.62), p-value = 0.3329, but for *Culex* mosquitoes, oviposition  
 383 was significantly decreased by predator presence: -1.69 (95% CI -2.82, -0.56), p-value =  
 384 0.0033 (Fig 4).

385

386 Table 4: Candidate multilevel mixed effects models of non-consumptive effects of predators  
 387 on mosquito oviposition behavior, fitted to dataset of effect sizes (n = 36 from 12 studies),  
 388 and ranked by corrected Akaike's information criterion (AICc).  
 389

| Moderator(s)    | Test of Moderators<br>(degrees of freedom, p-value) | AICc  | ΔAICc |
|-----------------|-----------------------------------------------------|-------|-------|
| vector genus    | 3, 0.0149                                           | 122.1 | 0     |
| none            | ----                                                | 125.2 | 3.1   |
| predator family | 12, 0.8855                                          | 167.9 | 45.8  |

390

391

392

393

394

395

396

397

398

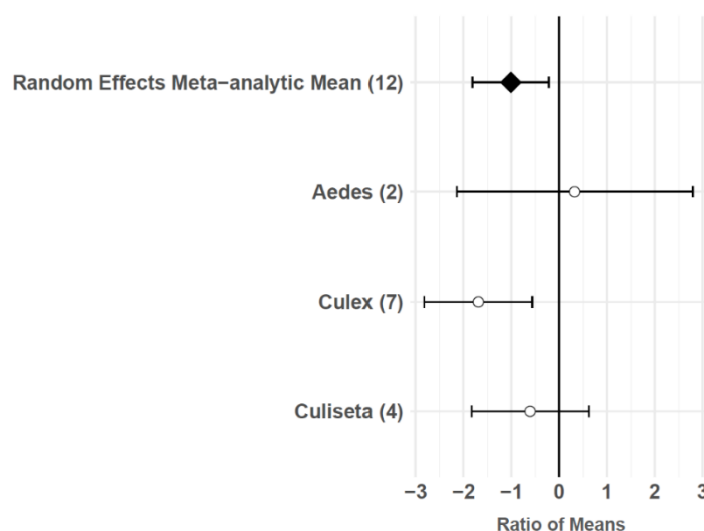

399 **Fig 4.** Oviposition effect sizes and 95% confidence intervals for different categories of vector  
 400 genus (with number of studies in parentheses)

401

## 402 **Discussion**

403

404 In this study, laboratory and semi-field empirical data were obtained through a systematic  
405 literature review and used to conduct a meta-analysis that assessed consumptive and non-  
406 consumptive effects of predators on mosquito prey. Some results agree with previously  
407 observed trends, such as greater consumptive effects from larger predators (Kumar et al.,  
408 2008, Peters, 1983) and no oviposition response to predator cues among container-breeding  
409 *Aedes* mosquitoes (Vonesh and Blaustein, 2010). However, this meta-analysis revealed  
410 additional trends. Mosquito larval instar had an important role in moderating consumptive  
411 effects of predators, likely because of its direct correlation to prey size. Furthermore, a small,  
412 but significant, decrease in mosquito survival due to non-consumptive effects of predators  
413 was observed, suggesting that mosquitoes can be “scared to death” by predators (Preisser et  
414 al., 2005). Both male and female body sizes were also reduced among mosquitoes that had  
415 been exposed to predators, and predator avoidance during oviposition was observed among  
416 female *Culex* mosquitoes. Effects of predators on different vector traits, particularly survival,  
417 body size, and oviposition behavior, have the potential to influence infectious disease  
418 dynamics.

419

420 Consumptive effects of predators on survival:

421 Several larger predators reduced mosquito survival, including freshwater fish (Cyprinidae  
422 and Poeciliidae), salamander larvae (Ambystomatidae), dragonfly larvae (Aeshnidae), and  
423 backswimmers (Notonectidae) (Fig 3a). This finding is consistent with a previous analysis  
424 which showed a positive linear relationship between predator body mass and ingestion rate  
425 across taxa (Peters, 1983). In addition, more effect size heterogeneity in the consumptive  
426 survival data was explained by an interaction between predator family and larval instar than

427 was explained by an interaction between predator family and vector genus (Table 3). This  
428 result suggests that the relative sizes of predator and prey groups could play a more important  
429 role in determining consumptive mosquito survival than variations in predator responses to  
430 different behaviors of prey genera, which are likely to be shaped by the degree of shared  
431 evolutionary history between trophic levels (Buchanan et al., 2017). Larval instar is an  
432 indicator of mosquito size, and previous modelling work has provided evidence of prey size  
433 selection by predators to maximize energetic gain (Mittelbach, 1981). While smaller  
434 cyclopoid copepods are more effective against early instar mosquito larvae (Dieng et al.,  
435 2002), larger predators including tadpoles, giant water bugs, dragonfly larvae, fish, and  
436 backswimmers are more effective against late instar larvae (Kweka et al., 2011).

437

438 Non-consumptive effects of predators on survival:

439 Exposure to predation cues significantly lowered mosquito survival, and this non-  
440 consumptive effect has also been observed in dragonfly larvae prey (*Leucorrhinia intacta*)  
441 that were exposed to caged predators (McCauley et al., 2011). The reduction in mosquito  
442 survival from non-consumptive effects of predators was significantly smaller than the  
443 reduction that was observed from consumptive effects. This is partially due to the practical  
444 constraints of most experimental designs, which cause consumptive and non-consumptive  
445 effects of predators on survival to be grouped together and reported as consumptive effects.  
446 The greater impact of combined consumptive and non-consumptive effects, in comparison to  
447 only non-consumptive effects, has previously been observed in pea aphids (*Acyrtosiphon*  
448 *pisum*) (Nelson et al., 2004).

449

450

451

452 Non-consumptive effects of predators on body size:

453 While predators did not significantly impact mosquito development time through non-  
454 consumptive effects in either sex, mosquito body size was decreased by the non-consumptive  
455 effects of predators in both sexes. Smaller body size is associated with lower reproductive  
456 success in mosquitoes because smaller females lay fewer eggs (Blackmore and Lord, 2000,  
457 Lyimo and Takken, 1993, Oliver and Howard, 2011, Styer et al., 2007, Tsunoda et al., 2010),  
458 and smaller males produce less sperm (Hatala et al., 2018, Ponlawat and Harrington, 2007).  
459 These effects suggest that predation could non-consumptively reduce mosquito population  
460 growth. The smaller size of mosquitoes exposed to predators could also limit disease  
461 transmission. Vector lifespan contributes disproportionately to disease transmission because  
462 older vectors are more likely to have been exposed to pathogens, more likely to already be  
463 infectious after having survived the extrinsic incubation period, and more likely to survive  
464 long enough to bite subsequent hosts (Cator et al., 2020). It is well-established that smaller  
465 mosquito body size is associated with shorter mosquito lifespan (Araújo et al., 2012, Hawley,  
466 1985, Reisen et al., 1984, Reiskind and Lounibos, 2009, Xue et al., 2010). Therefore, non-  
467 consumptive effects of predators may limit the transmission of mosquito-borne diseases.

468

469 Non-consumptive effects of predators on oviposition behavior:

470 Predator presence also non-consumptively reduced oviposition behavior in adult female  
471 mosquitoes. Meta-regression results showed that *Culex* females significantly avoid  
472 oviposition sites that contain predators or predator cues, but *Aedes* and *Culiseta* females do  
473 not avoid these sites, despite a slight non-significant trend towards predator avoidance in  
474 *Culiseta* (Fig 4). Both *Culex* and *Culiseta* mosquitoes have an “all-or-none” oviposition  
475 strategy (Johnson and Fonseca, 2014), in which they lay hundreds of rapidly-hatching eggs in  
476 rafts on the water’s surface (Day, 2016). Such an oviposition strategy is conducive to

477 evolving predator avoidance behaviors, and a previous meta-analysis showed significant  
478 predator avoidance in both *Culex* and *Culiseta* during oviposition (Vonesh and Blaustein,  
479 2010). Conversely, it is likely that an oviposition response to predation is not particularly  
480 advantageous for *Aedes* because the delayed hatching of their eggs (Day, 2016) can prevent  
481 the level of predation risk at the time of oviposition from matching the level of predation risk  
482 present in the eventual larval environment (Vonesh and Blaustein, 2010). The predator  
483 avoidance response in *Aedes* species that lay their eggs above the water's edge in containers  
484 has previously been described as "non-existent" (Vonesh and Blaustein, 2010). Both *Aedes*  
485 species included in this study's oviposition data subset, *Ae. albopictus* and *Ae. aegypti*, meet  
486 the criterion of ovipositing above water in containers (Juliano, 2009). Predator avoidance  
487 during oviposition has previously been found to increase the mosquito population size at  
488 equilibrium (Spencer et al., 2002). However, this study's results and those of a previous  
489 meta-analysis (Vonesh and Blaustein, 2010) suggest that models of oviposition site selection,  
490 such as those using parameters from Notonectidae predators and *Culiseta* prey (Kershenbaum  
491 et al., 2012), are not generalizable to *Aedes* vectors.

492

493 Implications for West Nile virus disease dynamics:

494 Predator avoidance during oviposition by *Culex* mosquitoes (Fig 4) may be of particular  
495 importance to West Nile virus (WNV) disease dynamics. Previous work has shown that *Cx.*  
496 *pipiens*, *Cx. restuans*, and *Cx. tarsalis* all avoid predator habitats (Vonesh and Blaustein,  
497 2010), and that *Cx. pipiens* is the primary bridge vector of WNV responsible for spill-over  
498 transmission from avian reservoir hosts to humans (Fonseca et al., 2004, Hamer et al., 2008,  
499 Kramer et al., 2008, Andreadis, 2012). *Cx. pipiens* mosquitoes can live in permanent aquatic  
500 environments, such as ground pools (Amini et al., 2020, Barr, 1967, Dida et al., 2018,  
501 Sulesco et al., 2015), ponds (Lühken et al., 2015), stream edges (Amini et al., 2020), and lake



502 edges (Vinogradova, 2000) that are more common in rural areas, but *Cx. pipiens* are also  
503 found in urban and suburban residential areas, where they typically breed in artificial  
504 containers (Sulesco et al., 2015), including tires (Lühken et al., 2015, Nikookar et al., 2017,  
505 Verna, 2015), rainwater tanks (Townroe and Callaghan, 2014), and catch basins (Gardner et  
506 al., 2012). Artificial containers are less likely to harbor larger predators, such as freshwater  
507 fish (Cyprinidae and Poeciliidae), salamander larvae (Ambystomatidae), dragonfly larvae  
508 (Aeshnidae), and backswimmers (Notonectidae) because temporary aquatic environments  
509 cannot support the relatively long development times of these organisms. The mean dispersal  
510 distance of adult *Culex* mosquitoes is greater than one kilometer (Ciota et al., 2012, Hamer et  
511 al., 2014), and female *Cx. pipiens* have exhibited longer dispersal distances after developing  
512 in the presence of a fish predator (Alcalay et al., 2018). Therefore, predator avoidance during  
513 oviposition may cause *Cx. pipiens* populations to disperse from permanent aquatic  
514 environments in more rural areas to artificial container environments in urbanized areas,  
515 where humans are known to be at a higher risk for WNV infection (Brown et al., 2008).  
516  
517 Predation cue levels may be altered by climate conditions, and these changes in cue levels  
518 can impact WNV transmission to humans. Drought has previously been associated with  
519 human WNV cases (Johnson and Sukhdeo, 2013, Marcantonio et al., 2015, Roehr, 2012,  
520 Shaman et al., 2005, Epstein and Defilippo, 2001, Paull et al., 2017), but the association has  
521 been described as “paradoxical” (Johnson and Fonseca, 2014) or “counterintuitive” (Johnson  
522 and Sukhdeo, 2013) and has thus far lacked a clear biological or ecological mechanism.  
523 Under drought conditions, the density of aquatic organisms increases and predation pressures  
524 can intensify due to compressed space and high encounter rates (Amundrud et al., 2019). A  
525 previous study of a stream ecosystem found that impacts of fish predation are more severe  
526 during the dry season (Dudgeon, 1993). In addition, reductions in water volume can facilitate

527 consumption of mosquito larvae prey by crane fly larvae (Tipulidae), whereas consumptive  
528 predation by tipulids was not observed at a higher water level (Amundrud et al., 2019).  
529 Although experimental oviposition studies tend to provide only predator-present and  
530 predator-absent options to gravid female mosquitoes (Arav and Blaustein, 2006, Ohba et al.,  
531 2012), some studies have found that mosquitoes also respond to a gradient of predation cues  
532 (Roux et al., 2014, Silberbush and Blaustein, 2011). Ovipositing females exhibit a preference  
533 for sites with a lower predator density (Silberbush and Blaustein, 2011), and the frequency of  
534 anti-predator behavior has been shown to increase with concentration of predation cues  
535 (Roux et al., 2014). Therefore, as predation cue levels increase due to drought, permanent  
536 aquatic habitats are likely to transition from suitable oviposition sites for one generation of  
537 female mosquitoes, to unsuitable oviposition sites for the next generation.

538

539 When suitable oviposition sites are absent, females retain their eggs until sites become  
540 available (Bentley and Day, 1989). The reproductive potential of *Cx. pipiens* females is not  
541 diminished by egg retention periods that are up to five weeks long; this allows gravid females  
542 enough time to find the best available oviposition sites, which are often container habitats  
543 with low predation risk located in residential areas (Johnson and Fonseca, 2014). The  
544 migration of gravid female *Cx. pipiens* to residential areas increases the risk of WNV spill-  
545 over to humans because these egg-bearing vectors are likely to have already blood-fed once  
546 or multiple times (Clements, 1992), and therefore have a relatively high risk of WNV  
547 infection. This is consistent with studies that have reported associations between drought and  
548 WNV-infected mosquitoes in urban and residential areas (Johnson and Sukhdeo, 2013, Paull  
549 et al., 2017). In addition, vertical transmission of WNV from gravid females to their eggs  
550 may occur during oviposition (Rosen, 1988), when the virus is transmitted to the next  
551 generation by an accessory gland fluid that attaches the eggs together to form a raft (Nelms et

552 al., 2013). Because the rate of vertical transmission in *Cx. pipiens* increases with the number  
553 of days since WNV infection (Anderson et al., 2008), extended searches for oviposition sites  
554 due to drought conditions could increase the frequency of vertical transmission. However, the  
555 impact of vertical transmission on WNV epidemics is thought to be minimal because when  
556 transmission to an egg raft did occur, only 4.7% of the progeny were found to be infected as  
557 adults (Anderson et al., 2008), and only about half of those infected adults are estimated to be  
558 female. In summary, the movement of *Cx. pipiens* females toward more residential areas,  
559 combined with potential limited WNV amplification due to increased vertical transmission,  
560 suggests that the vector trait of predator avoidance during oviposition by *Cx. pipiens* females  
561 is the behavioral mechanism underlying previously observed associations between drought  
562 and human WNV cases.

563

564 Implications for mosquito-borne disease modelling:

565 Although the aquatic phase of the mosquito life cycle is often overlooked in mathematical  
566 models of mosquito-borne pathogen transmission (Reiner et al., 2013), vector survival at  
567 immature stages plays an important role in determining mosquito population abundance,  
568 which is an essential factor for predicting disease transmission (Beck-Johnson et al., 2013).  
569 The results of this study show that mosquito survival decreases among the *Aedes*, *Anopheles*,  
570 and *Culex* genera due to consumptive effects of predators (Fig 3b), and that there is also a  
571 reduction in mosquito survival due to non-consumptive effects. Other studies have  
572 demonstrated that aquatic predators dramatically impact mosquito survival and abundance.  
573 For example, a biocontrol intervention relying on the application of copepod predators  
574 eliminated *Aedes albopictus* from three communes in Nam Dinh, Vietnam, where dengue  
575 transmission was previously detected, and reduced vector abundance by 86-98% in three  
576 other communes (Kay et al., 2002). Conversely, the annual abundance of *Culex* and

577 *Anopheles* mosquitoes was observed to increase 15-fold in semi-permanent wetlands in the  
578 year following a drought, likely because the drought eliminated aquatic predators from  
579 wetlands that dried completely, and mosquitoes were able to re-colonize newly-formed  
580 aquatic habitats more quickly than their most effective predators (Chase and Knight, 2003).  
581  
582 While relationships between temperature and different vector traits, such as fecundity and  
583 lifespan, have been incorporated into models of temperature effects on mosquito population  
584 density (El Moustaid and Johnson, 2019), models of predator effects on vector borne disease  
585 transmission have focused primarily on the impacts of predation on vector survival. Previous  
586 models have shown that predators of vector species can decrease or eliminate pathogen  
587 infection in host populations as vector fecundity increases (Moore et al., 2010). The findings  
588 of this meta-analysis suggest that predators also decrease vector fecundity through non-  
589 consumptive effects on vector body size. In addition, the entomological inoculation rate  
590 (EIR) is likely to be reduced by effects of predators on mosquito fecundity and lifespan, as  
591 well as effects of predators on mosquito survival. The EIR has been defined as the product of  
592 three variables: ( $m$ ) the number of mosquitoes per host, ( $a$ ) the daily rate of mosquito biting,  
593 and ( $s$ ) the proportion of mosquitoes that are infectious (Beck-Johnson et al., 2013). Based on  
594 this study's findings, predators are likely to decrease the number of mosquitoes per host by  
595 reducing mosquito survival through both consumptive and non-consumptive effects, and by  
596 reducing mosquito fecundity through non-consumptive effects on body size. In addition,  
597 predators are likely to decrease the proportion of mosquitoes that are infectious by shortening  
598 the vector lifespan through non-consumptive effects on body size. The relationship between  
599 mosquito body size and biting rate is unclear, with some studies showing higher biting rates  
600 among larger mosquitoes (Araújo et al., 2012, Gunathilaka et al., 2019), and others reporting  
601 higher biting rates among smaller mosquitoes (Farjana and Tuno, 2013, Leisnham et al.,

602 2008). The links between factors that influence the EIR and observed effects of predators on  
603 mosquito prey demonstrate the necessity of including both consumptive and non-  
604 consumptive effects of predators in models of mosquito-borne disease.

605

## 606 **Conclusion**

607

608 This meta-analysis on mosquito predation demonstrates that predators not only play an  
609 important role in directly reducing mosquito populations, but also have non-consumptive  
610 effects on surviving mosquitoes that may ultimately reduce further population growth and  
611 decrease disease transmission. While families of larger sized predators were effective in  
612 reducing mosquito survival, other factors, such as impacts on native species, as well as the  
613 economic cost of mass-rearing and field applications (Kumar and Hwang, 2006, Pyke, 2008),  
614 should be carefully considered before selecting a predator as a suitable biocontrol agent.

615 Predictive disease models are likely to be more reliable when the non-consumptive effects of  
616 predation are incorporated. Although exposure of mosquito larvae to predators is  
617 commonplace in outdoor field settings, it remains rare in most laboratory-based assessments  
618 of vector traits. Therefore, mosquitoes observed in nature are likely to have smaller body  
619 sizes than those observed under optimal laboratory conditions. It is important for disease  
620 modelers to recognize these impacts of predation on vector traits as they can reduce mosquito  
621 population growth and limit disease transmission due to shorter vector lifespans. Within the  
622 WNV disease system, consideration of the oviposition behavioral response to predation cues  
623 by *Culex* vectors can greatly improve current understanding of the association between  
624 drought and human cases. This study provides general estimates of the effects of predators on  
625 selected mosquito traits for use in predictive disease models.

626

627 Future directions:

628 Modelling efforts that aim to optimize the application of biocontrol predators should also  
629 consider incorporating predator effects on vector survival, fecundity, and lifespan. These  
630 additions to predictive models of various biocontrol interventions are likely to help public  
631 health officials choose the most cost-effective strategies for limiting disease transmission. In  
632 the sixty-study database that was compiled, only one study was designed to directly measure  
633 the effect of larval-stage predation on vector competence (Roux et al., 2015). Therefore,  
634 future efforts to assess the impact of predators on mosquito-borne disease transmission  
635 should prioritize experimental studies in which infected mosquito larvae are observed  
636 throughout an initial period of aquatic exposure to predators, followed by a period of blood-  
637 feeding in the adult stage.

638

639 Two studies from the compiled database examined the compatibility of predators with  
640 *Bacillus thuringiensis* var. *israelensis* (*Bti*), a commonly used bacterial biocontrol agent  
641 (Chansang et al., 2004, Op de Beeck et al., 2016). Previous studies have supported the  
642 simultaneous application of cyclopoid copepod predators and *Bti* (Marten et al., 1993, Tietze  
643 et al., 1994), but additional analyses are needed on the use of *Bti* with other families of  
644 mosquito predators. Populations of other insect pests, such as the southern green stink bug  
645 (*Nezara viridula*), are known to be regulated by both predators and parasites (Ehler, 2002).  
646 The literature search conducted for this meta-analysis returned studies on water mite parasites  
647 (Rajendran and Prasad, 1994) and nematode parasitoids (de Valdez, 2006) of mosquitoes, and  
648 ascogregarine parasites have previously been evaluated as biocontrol agents against *Aedes*  
649 mosquitoes (Tseng, 2007). A more thorough review of the impacts of parasites and  
650 parasitoids on vector traits, such as survival, fecundity, and lifespan, is needed before  
651 incorporating these potential biocontrol agents into integrated vector control plans.

652

### 653 **Author Contributions**

654

655 Conceptualization, all authors; data curation, MCR, CMH, ZG, CR, FEM, MVE, TD, NLG,  
656 SLH, ACM; formal analysis, investigation, methodology, and validation MCR, CMH, ZG,  
657 CR, MVE, ACM; project administration, MCR, CMH, ACM; software, MCR, CMH, MVE,  
658 ZG, ACM; supervision CMH, NLG, SLH, AGP, ACM; visualization, MCR, CMH, TD,  
659 ACM; writing— original draft, MCR; writing—review and editing, all authors. None of the  
660 authors have any competing interests to declare.

661

### 662 **Acknowledgements**

663

664 We are grateful to Dr. Lauren Cator for facilitating the early stages of this project and helping  
665 to edit this manuscript. We also thank Dr. Peter Hudson for his helpful advice in early  
666 discussions about the project's aims. In addition, we thank all members of the VectorBiTE  
667 RCN (<https://vectorbite.org/>) for taking the initiative to forge productive collaborations  
668 between empiricists and modelers in vector ecology. This work was funded by NIH grant  
669 1R01AI122284-01 and BBSRC grant BB/N013573/1 as part of the joint (NIH-NSF-USDA-  
670 BBSRC) Ecology and Evolution of Infectious Diseases program. It was also funded by a  
671 President's PhD Scholarship from Imperial College London awarded to Marie C. Russell.

672

### 673 **Supplementary Information**

674

675

676

677

678 Table S1: Publications included in the database and their types of vector trait data  
679

| Publication                    | Vector Trait                        |                                     |                                     |                                     |
|--------------------------------|-------------------------------------|-------------------------------------|-------------------------------------|-------------------------------------|
|                                | Survival                            | Behavior                            | Size                                | Development                         |
| (Alcalay et al., 2018)         | <input checked="" type="checkbox"/> | <input type="checkbox"/>            | <input checked="" type="checkbox"/> | <input checked="" type="checkbox"/> |
| (Alcalay et al., 2019)         | <input type="checkbox"/>            | <input checked="" type="checkbox"/> | <input type="checkbox"/>            | <input type="checkbox"/>            |
| (Arav and Blaustein, 2006)     | <input type="checkbox"/>            | <input checked="" type="checkbox"/> | <input type="checkbox"/>            | <input type="checkbox"/>            |
| (Beketov and Liess, 2007)      | <input checked="" type="checkbox"/> | <input type="checkbox"/>            | <input checked="" type="checkbox"/> | <input checked="" type="checkbox"/> |
| (Blaustein et al., 2005)       | <input type="checkbox"/>            | <input checked="" type="checkbox"/> | <input type="checkbox"/>            | <input type="checkbox"/>            |
| (Blaustein and Margalit, 1996) | <input checked="" type="checkbox"/> | <input type="checkbox"/>            | <input type="checkbox"/>            | <input type="checkbox"/>            |
| (Bond et al., 2005)            | <input type="checkbox"/>            | <input type="checkbox"/>            | <input checked="" type="checkbox"/> | <input checked="" type="checkbox"/> |
| (Bowatte et al., 2013)         | <input checked="" type="checkbox"/> | <input checked="" type="checkbox"/> | <input type="checkbox"/>            | <input type="checkbox"/>            |
| (Bucciarelli et al., 2019)     | <input checked="" type="checkbox"/> | <input type="checkbox"/>            | <input type="checkbox"/>            | <input type="checkbox"/>            |
| (Calliari et al., 2003)        | <input checked="" type="checkbox"/> | <input type="checkbox"/>            | <input type="checkbox"/>            | <input type="checkbox"/>            |
| (Chandrasegaran et al., 2018)  | <input type="checkbox"/>            | <input checked="" type="checkbox"/> | <input type="checkbox"/>            | <input type="checkbox"/>            |
| (Chansang et al., 2004)        | <input checked="" type="checkbox"/> | <input type="checkbox"/>            | <input type="checkbox"/>            | <input type="checkbox"/>            |
| (Cuthbert et al., 2018)        | <input checked="" type="checkbox"/> | <input type="checkbox"/>            | <input type="checkbox"/>            | <input type="checkbox"/>            |
| (Cuthbert et al., 2019a)       | <input checked="" type="checkbox"/> | <input type="checkbox"/>            | <input type="checkbox"/>            | <input type="checkbox"/>            |
| (Cuthbert et al., 2019b)       | <input type="checkbox"/>            | <input checked="" type="checkbox"/> | <input type="checkbox"/>            | <input type="checkbox"/>            |
| (de Valdez, 2007)              | <input type="checkbox"/>            | <input checked="" type="checkbox"/> | <input type="checkbox"/>            | <input type="checkbox"/>            |
| (Dieng et al., 2002)           | <input checked="" type="checkbox"/> | <input type="checkbox"/>            | <input type="checkbox"/>            | <input type="checkbox"/>            |
| (Dieng et al., 2003)           | <input checked="" type="checkbox"/> | <input type="checkbox"/>            | <input type="checkbox"/>            | <input type="checkbox"/>            |
| (Farajollahi et al., 2009)     | <input checked="" type="checkbox"/> | <input type="checkbox"/>            | <input type="checkbox"/>            | <input type="checkbox"/>            |
| (Fischer et al., 2012)         | <input type="checkbox"/>            | <input type="checkbox"/>            | <input checked="" type="checkbox"/> | <input checked="" type="checkbox"/> |
| (Fontana-Bria et al., 2017)    | <input type="checkbox"/>            | <input type="checkbox"/>            | <input checked="" type="checkbox"/> | <input checked="" type="checkbox"/> |
| (Futami et al., 2008)          | <input checked="" type="checkbox"/> | <input type="checkbox"/>            | <input type="checkbox"/>            | <input type="checkbox"/>            |
| (Grill and Juliano, 1996)      | <input checked="" type="checkbox"/> | <input checked="" type="checkbox"/> | <input checked="" type="checkbox"/> | <input checked="" type="checkbox"/> |
| (Griswold and Lounibos, 2005)  | <input checked="" type="checkbox"/> | <input type="checkbox"/>            | <input type="checkbox"/>            | <input type="checkbox"/>            |
| (Irwin and Paskewitz, 2009)    | <input checked="" type="checkbox"/> | <input type="checkbox"/>            | <input type="checkbox"/>            | <input type="checkbox"/>            |
| (Kalimuthu et al., 2017)       | <input checked="" type="checkbox"/> | <input type="checkbox"/>            | <input type="checkbox"/>            | <input type="checkbox"/>            |
| (Knight et al., 2004)          | <input checked="" type="checkbox"/> | <input type="checkbox"/>            | <input type="checkbox"/>            | <input checked="" type="checkbox"/> |
| (Kraus and Vonesh, 2010)       | <input type="checkbox"/>            | <input checked="" type="checkbox"/> | <input type="checkbox"/>            | <input type="checkbox"/>            |
| (Krol et al., 2019)            | <input checked="" type="checkbox"/> | <input type="checkbox"/>            | <input type="checkbox"/>            | <input checked="" type="checkbox"/> |
| (Kweka et al., 2011)           | <input checked="" type="checkbox"/> | <input type="checkbox"/>            | <input type="checkbox"/>            | <input type="checkbox"/>            |
| (Marten et al., 2000a)         | <input checked="" type="checkbox"/> | <input type="checkbox"/>            | <input type="checkbox"/>            | <input type="checkbox"/>            |
| (Marten et al., 2000b)         | <input checked="" type="checkbox"/> | <input type="checkbox"/>            | <input type="checkbox"/>            | <input type="checkbox"/>            |
| (Mercer et al., 2005)          | <input checked="" type="checkbox"/> | <input type="checkbox"/>            | <input checked="" type="checkbox"/> | <input type="checkbox"/>            |
| (Micieli et al., 2002)         | <input checked="" type="checkbox"/> | <input type="checkbox"/>            | <input type="checkbox"/>            | <input type="checkbox"/>            |
| (Minakawa et al., 2007)        | <input checked="" type="checkbox"/> | <input type="checkbox"/>            | <input type="checkbox"/>            | <input type="checkbox"/>            |
| (Nannini and Juliano, 1998)    | <input checked="" type="checkbox"/> | <input type="checkbox"/>            | <input type="checkbox"/>            | <input type="checkbox"/>            |
| (Ohba et al., 2012)            | <input checked="" type="checkbox"/> | <input checked="" type="checkbox"/> | <input checked="" type="checkbox"/> | <input type="checkbox"/>            |
| (Op de Beeck et al., 2016)     | <input type="checkbox"/>            | <input type="checkbox"/>            | <input checked="" type="checkbox"/> | <input checked="" type="checkbox"/> |
| (Orr and Resh, 1989)           | <input checked="" type="checkbox"/> | <input type="checkbox"/>            | <input type="checkbox"/>            | <input type="checkbox"/>            |
| (Pintar et al., 2018)          | <input type="checkbox"/>            | <input checked="" type="checkbox"/> | <input type="checkbox"/>            | <input type="checkbox"/>            |
| (Roberts, 2012)                | <input type="checkbox"/>            | <input checked="" type="checkbox"/> | <input checked="" type="checkbox"/> | <input checked="" type="checkbox"/> |
| (Roberts, 2018)                | <input type="checkbox"/>            | <input type="checkbox"/>            | <input checked="" type="checkbox"/> | <input checked="" type="checkbox"/> |
| (Roux et al., 2015)            | <input checked="" type="checkbox"/> | <input type="checkbox"/>            | <input checked="" type="checkbox"/> | <input checked="" type="checkbox"/> |



| Publication (continued)          | Vector Trait (continued)            |                                     |                                     |                                     |
|----------------------------------|-------------------------------------|-------------------------------------|-------------------------------------|-------------------------------------|
|                                  | Survival                            | Behavior                            | Size                                | Development                         |
| (Rubbo et al., 2011)             | <input checked="" type="checkbox"/> | <input checked="" type="checkbox"/> | <input checked="" type="checkbox"/> | <input type="checkbox"/>            |
| (Schrama et al., 2018)           | <input checked="" type="checkbox"/> | <input type="checkbox"/>            | <input type="checkbox"/>            | <input type="checkbox"/>            |
| (Silberbush et al., 2015)        | <input checked="" type="checkbox"/> | <input type="checkbox"/>            | <input type="checkbox"/>            | <input checked="" type="checkbox"/> |
| (Silberbush and Blaustein, 2008) | <input type="checkbox"/>            | <input checked="" type="checkbox"/> | <input type="checkbox"/>            | <input type="checkbox"/>            |
| (Silberbush and Blaustein, 2011) | <input type="checkbox"/>            | <input checked="" type="checkbox"/> | <input type="checkbox"/>            | <input type="checkbox"/>            |
| (Soghigian et al., 2017)         | <input checked="" type="checkbox"/> | <input checked="" type="checkbox"/> | <input type="checkbox"/>            | <input type="checkbox"/>            |
| (Staats et al., 2016)            | <input type="checkbox"/>            | <input checked="" type="checkbox"/> | <input type="checkbox"/>            | <input type="checkbox"/>            |
| (Stav et al., 2005)              | <input checked="" type="checkbox"/> | <input type="checkbox"/>            | <input checked="" type="checkbox"/> | <input checked="" type="checkbox"/> |
| (Subramaniam et al., 2015)       | <input checked="" type="checkbox"/> | <input type="checkbox"/>            | <input type="checkbox"/>            | <input type="checkbox"/>            |
| (Tietze and Mulla, 1990)         | <input checked="" type="checkbox"/> | <input type="checkbox"/>            | <input type="checkbox"/>            | <input checked="" type="checkbox"/> |
| (van Uitregt et al., 2012)       | <input checked="" type="checkbox"/> | <input checked="" type="checkbox"/> | <input checked="" type="checkbox"/> | <input checked="" type="checkbox"/> |
| (van Uitregt et al., 2013)       | <input type="checkbox"/>            | <input checked="" type="checkbox"/> | <input checked="" type="checkbox"/> | <input type="checkbox"/>            |
| (Veronesi et al., 2015)          | <input checked="" type="checkbox"/> | <input type="checkbox"/>            | <input type="checkbox"/>            | <input type="checkbox"/>            |
| (Wallace and Merritt, 1999)      | <input checked="" type="checkbox"/> | <input type="checkbox"/>            | <input checked="" type="checkbox"/> | <input checked="" type="checkbox"/> |
| (Yanoviak, 1999)                 | <input checked="" type="checkbox"/> | <input type="checkbox"/>            | <input checked="" type="checkbox"/> | <input type="checkbox"/>            |
| (Zuharah et al., 2013)           | <input checked="" type="checkbox"/> | <input type="checkbox"/>            | <input type="checkbox"/>            | <input type="checkbox"/>            |
| (Zuharah and Lester, 2010)       | <input checked="" type="checkbox"/> | <input type="checkbox"/>            | <input type="checkbox"/>            | <input type="checkbox"/>            |

680

681

682

## 683 References

- 684 ALCALAY, Y., TSURIM, I. & OVADIA, O. 2018. Female mosquitoes disperse further  
685 when they develop under predation risk. *Behavioral Ecology*, 29, 1402-1408.
- 686 ALCALAY, Y., TSURIM, I. & OVADIA, O. 2019. Multi-scale oviposition site selection in  
687 two mosquito species. *Ecological Entomology*, 44, 347-356.
- 688 AMINI, M., HANAFI-BOJD, A. A., AGHAPOUR, A. A. & CHAVSHIN, A. R. 2020.  
689 Larval habitats and species diversity of mosquitoes (Diptera: Culicidae) in West  
690 Azerbaijan Province, Northwestern Iran. *Bmc Ecology*, 20.
- 691 AMUNDRUD, S. L., CLAY-SMITH, S. A., FLYNN, B. L., HIGGINS, K. E., REICH, M. S.,  
692 WIENS, D. R. H. & SRIVASTAVA, D. S. 2019. Drought alters the trophic role of an  
693 opportunistic generalist in an aquatic ecosystem. *Oecologia*, 189, 733-744.
- 694 ANDERSON, J. F., MAIN, A. J., DELROUX, K. & FIKRIG, E. 2008. Extrinsic incubation  
695 periods for horizontal and vertical transmission of West Nile virus by *Culex pipiens*  
696 *pipiens* (Diptera: Culicidae). *J Med Entomol*, 45, 445-51.
- 697 ANDREADIS, T. G. 2012. THE CONTRIBUTION OF CULEX PIPIENS COMPLEX  
698 MOSQUITOES TO TRANSMISSION AND PERSISTENCE OF WEST NILE  
699 VIRUS IN NORTH AMERICA. *Journal of the American Mosquito Control*  
700 *Association*, 28, 137-151.
- 701 ARAÚJO, M. D., GIL, L. H. S. & E-SILVA, A. D. 2012. Larval food quantity affects  
702 development time, survival and adult biological traits that influence the vectorial  
703 capacity of *Anopheles darlingi* under laboratory conditions. *Malaria Journal*, 11.
- 704 ARAV, D. & BLAUSTEIN, L. 2006. Effects of pool depth and risk of predation on  
705 oviposition habitat selection by temporary pool dipterans. *Journal of Medical*  
706 *Entomology*, 43, 493-497.

- 707 BARR, A. R. 1967. Occurrence and distribution of the *Culex pipiens* complex. *Bulletin of the*  
708 *World Health Organization*, 37, 293-296.
- 709 BECK-JOHNSON, L. M., NELSON, W. A., PAAIJMANS, K. P., READ, A. F., THOMAS,  
710 M. B. & BJØRNSTAD, O. N. 2013. The effect of temperature on *Anopheles*  
711 mosquito population dynamics and the potential for malaria transmission. *PLoS One*,  
712 8, e79276.
- 713 BEKETOV, M. A. & LIESS, M. 2007. Predation risk perception and food scarcity induce  
714 alterations of life-cycle traits of the mosquito *Culex pipiens*. *Ecological Entomology*,  
715 32, 405-410.
- 716 BENELLI, G., JEFFRIES, C. L. & WALKER, T. 2016. Biological Control of Mosquito  
717 Vectors: Past, Present, and Future. *Insects*, 7.
- 718 BENTLEY, M. D. & DAY, J. F. 1989. Chemical ecology and behavioral aspects of mosquito  
719 oviposition. *Annu Rev Entomol*, 34, 401-21.
- 720 BLACKMORE, M. S. & LORD, C. C. 2000. The relationship between size and fecundity in  
721 *Aedes albopictus*. *Journal of Vector Ecology*, 25, 212-217.
- 722 BLAUSTEIN, L., BLAUSTEIN, J. & CHASE, J. 2005. Chemical detection of the predator  
723 *Notonecta irrorata* by ovipositing *Culex* mosquitoes. *Journal of Vector Ecology*, 30,  
724 299-301.
- 725 BLAUSTEIN, L. & MARGALIT, J. 1996. Priority Effects in Temporary Pools: Nature and  
726 Outcome of Mosquito Larva-Toad Tadpole Interactions Depend on Order of  
727 Entrance. *Journal of Animal Ecology*, 65, 77-84.
- 728 BOND, J. G., ARREDONDO-JIMENEZ, J. I., RODRIGUEZ, M. H., QUIROZ-  
729 MARTINEZ, H. & WILLIAMS, T. 2005. Oviposition habitat selection for a predator  
730 refuge and food source in a mosquito. *Ecological Entomology*, 30, 255-263.
- 731 BOWATTE, G., PERERA, P., SENEVIRATHNE, G., MEEGASKUMBURA, S. &  
732 MEEGASKUMBURA, M. 2013. Tadpoles as dengue mosquito (*Aedes aegypti*) egg  
733 predators. *Biological Control*, 67, 469-474.
- 734 BROSE, U., JONSSON, T., BERLOW, E. L., WARREN, P., BANASEK-RICHTER, C.,  
735 BERSIER, L. F., BLANCHARD, J. L., BREY, T., CARPENTER, S. R.,  
736 BLANDENIER, M. F. C., CUSHING, L., DAWAH, H. A., DELL, T., EDWARDS,  
737 F., HARPER-SMITH, S., JACOB, U., LEDGER, M. E., MARTINEZ, N. D.,  
738 MEMMOTT, J., MINTENBECK, K., PINNEGAR, J. K., RALL, B. C., RAYNER, T.  
739 S., REUMAN, D. C., RUESS, L., ULRICH, W., WILLIAMS, R. J., WOODWARD,  
740 G. & COHEN, J. E. 2006. Consumer-resource body-size relationships in natural food  
741 webs. *Ecology*, 87, 2411-2417.
- 742 BROWN, H. E., CHILDS, J. E., DIUK-WASSER, M. A. & FISH, D. 2008. Ecological  
743 factors associated with West Nile virus transmission, northeastern United States.  
744 *Emerg Infect Dis*, 14, 1539-45.
- 745 BUCCIARELLI, G. M., SUH, D., LAMB, A. D., ROBERTS, D., SHARPTON, D.,  
746 SHAFFER, H. B., FISHER, R. N. & KATS, L. B. 2019. Assessing effects of non-  
747 native crayfish on mosquito survival. *Conservation Biology*, 33, 122-131.
- 748 BUCHANAN, A. L., HERMANN, S. L., LUND, M. & SZENDREI, Z. 2017. A meta-  
749 analysis of non-consumptive predator effects in arthropods: the influence of  
750 organismal and environmental characteristics. *Oikos*, 126, 1233-1240.
- 751 BURNHAM, K. P. & ANDERSON, D. R. 2004. Multimodel Inference: Understanding AIC  
752 and BIC in Model Selection. *Sociological Methods & Research*, 33, 261-304.
- 753 CALLIARI, D., SANZ, K., MARTINEZ, M., CERVETTO, G., GOMEZ, M. & BASSO, C.  
754 2003. Comparison of the predation rate of freshwater cyclopoid copepod species on  
755 larvae of the mosquito *Culex pipiens*. *Medical and veterinary entomology*, 17, 339-  
756 342.

- 757 CATOR, L. J., JOHNSON, L. R., MORDECAI, E. A., EL MOUSTAID, F., SMALLWOOD,  
758 T. R. C., LADEAU, S. L., JOHANSSON, M. A., HUDSON, P. J., BOOTS, M.,  
759 THOMAS, M. B., POWER, A. G. & PAWAR, S. 2020. The Role of Vector Trait  
760 Variation in Vector-Borne Disease Dynamics. *Frontiers in Ecology and Evolution*, 8.  
761 CHANDRASEGARAN, K., SINGH, A., LAHA, M. & QUADER, S. 2018. Playing it safe?  
762 Behavioural responses of mosquito larvae encountering a fish predator. *Ethology*  
763 *Ecology & Evolution*, 30, 70-87.  
764 CHANSANG, U. R., BHUMIRATANA, A. & KITTAYAPONG, P. 2004. Combination of  
765 Mesocyclops thermocyclopoides and Bacillus thuringiensis var. israelensis: A better  
766 approach for the control of Aedes aegypti larvae in water containers. *Journal of*  
767 *Vector Ecology*, 29, 218-226.  
768 CHASE, J. M. & KNIGHT, T. M. 2003. Drought-induced mosquito outbreaks in wetlands.  
769 *Ecology Letters*, 6, 1017-1024.  
770 CIOTA, A. T., DRUMMOND, C. L., RUBY, M. A., DROBNACK, J., EBEL, G. D. &  
771 KRAMER, L. D. 2012. Dispersal of Culex mosquitoes (Diptera: Culicidae) from a  
772 wastewater treatment facility. *J Med Entomol*, 49, 35-42.  
773 CLEMENTS, A. N. 1992. *The Biology of Mosquitoes: Development, Nutrition and*  
774 *Reproduction*, London, Chapman & Hall.  
775 CUTHBERT, R. N., DALU, T., WASSERMAN, R. J., COUGHLAN, N. E., CALLAGHAN,  
776 A., WEYL, O. L. F. & DICK, J. T. A. 2018. Muddy waters: Efficacious predation of  
777 container-breeding mosquitoes by a newly-described calanoid copepod across  
778 differential water clarities. *Biological Control*, 127, 25-30.  
779 CUTHBERT, R. N., DALU, T., WASSERMAN, R. J., WEYL, O. L. F., CALLAGHAN, A.,  
780 FRONEMAN, W. & DICK, J. T. A. 2019a. Sex-skewed trophic impacts in ephemeral  
781 wetlands. *Freshwater Biology*, 64, 359-366.  
782 CUTHBERT, R. N., ORTIZ-PEREA, N., DICK, J. T. A. & CALLAGHAN, A. 2019b.  
783 Elusive enemies: Consumptive and ovipositional effects on mosquitoes by predatory  
784 midge larvae are enhanced in dyed environments. *Biological Control*, 132, 116-121.  
785 DAM, H. G. & PETERSON, W. T. 1988. THE EFFECT OF TEMPERATURE ON THE  
786 GUT CLEARANCE RATE-CONSTANT OF PLANKTONIC COPEPODS. *Journal*  
787 *of Experimental Marine Biology and Ecology*, 123, 1-14.  
788 DAY, J. F. 2016. Mosquito Oviposition Behavior and Vector Control. *Insects*, 7.  
789 DE VALDEZ, M. R. 2007. Predator avoidance behavior of Aedes aegypti mosquito larvae  
790 infected with mermithid nematodes (Nematoda: Mermithidae). *J Vector Ecol*, 32,  
791 150-3.  
792 DE VALDEZ, M. R. W. 2006. Parasitoid-induced behavioral alterations of Aedes aegypti  
793 mosquito larvae infected with mermithid nematodes (Nematoda : Mermithidae).  
794 *Journal of Vector Ecology*, 31, 344-354.  
795 DELNAT, V., TRAN, T. T., JANSSENS, L. & STOKS, R. 2019. Resistance to a chemical  
796 pesticide increases vulnerability to a biopesticide: Effects on direct mortality and  
797 mortality by predation. *Aquat Toxicol*, 216, 105310.  
798 DIDA, G. O., ANYONA, D. N., ABUOM, P. O., AKOKO, D., ADOKA, S. O., MATANO,  
799 A. S., OWUOR, P. O. & OUMA, C. 2018. Spatial distribution and habitat  
800 characterization of mosquito species during the dry season along the Mara River and  
801 its tributaries, in Kenya and Tanzania. *Infectious Diseases of Poverty*, 7.  
802 DIENG, H., BOOTS, M., TUNO, N., TSUDA, Y. & TAKAGI, M. 2002. A laboratory and  
803 field evaluation of Macrocyclus distinctus, Megacyclus viridis and Mesocyclops  
804 pehpeiensis as control agents of the dengue vector Aedes albopictus in a peridomestic  
805 area in Nagasaki, Japan. *Medical and Veterinary Entomology*, 16, 285-291.

- 806 DIENG, H., BOOTS, M., TUNO, N., TSUDA, Y. & TAKAGI, M. 2003. Life history effects  
807 of prey choice by copepods: Implications for biocontrol of vector mosquitoes. *Journal*  
808 *of the American Mosquito Control Association*, 19, 67-73.
- 809 DUDGEON, D. 1993. THE EFFECTS OF SPATE-INDUCED DISTURBANCE,  
810 PREDATION AND ENVIRONMENTAL COMPLEXITY ON  
811 MACROINVERTEBRATES IN A TROPICAL STREAM. *Freshwater Biology*, 30,  
812 189-197.
- 813 DUVAL, S. & TWEEDIE, R. 2000a. A nonparametric "trim and fill" method of accounting  
814 for publication bias in meta-analysis. *Journal of the American Statistical Association*,  
815 95, 89-98.
- 816 DUVAL, S. & TWEEDIE, R. 2000b. Trim and fill: A simple funnel-plot-based method of  
817 testing and adjusting for publication bias in meta-analysis. *Biometrics*, 56, 455-463.
- 818 EHLER, L. E. 2002. An evaluation of some natural enemies of *Nezara viridula* in northern  
819 California. *BioControl*, 47, 309-325.
- 820 EL MOUSTAID, F. & JOHNSON, L. R. 2019. Modeling Temperature Effects on Population  
821 Density of the Dengue Mosquito *Aedes aegypti*. *Insects*, 10, 393.
- 822 ENGLUND, G., OHLUND, G., HEIN, C. L. & DIEHL, S. 2011. Temperature dependence of  
823 the functional response. *Ecology Letters*, 14, 914-921.
- 824 EPSTEIN, P. R. & DEFILIPPO, C. 2001. West Nile Virus and Drought. *Global Change and*  
825 *Human Health*, 2, 105-107.
- 826 FARAJOLLAHI, A., KESAVARAJU, B., NELDER, M. P., CRANS, S. C. & GAUGLER,  
827 R. 2009. An unusual larval collection and survival of *Orthopodomyia signifera* in the  
828 presence of the predator *Toxorhynchites rutilus septentrionalis*. *J Am Mosq Control*  
829 *Assoc*, 25, 370-3.
- 830 FARJANA, T. & TUNO, N. 2013. Multiple Blood Feeding and Host-Seeking Behavior in  
831 *Aedes aegypti* and *Aedes albopictus* (Diptera: Culicidae). *Journal of Medical*  
832 *Entomology*, 50, 838-846.
- 833 FISCHER, S., PEREYRA, D. & FERNÁNDEZ, L. 2012. Predation ability and non-  
834 consumptive effects of *Notonecta sellata* (Heteroptera: Notonectidae) on immature  
835 stages of *Culex pipiens* (Diptera: Culicidae). *Journal of Vector Ecology*, 37, 245-251.
- 836 FONSECA, D. M., KEYGHOBADI, N., MALCOLM, C. A., MEHMET, C., SCHAFFNER,  
837 F., MOGI, M., FLEISCHER, R. C. & WILKERSON, R. C. 2004. Emerging vectors  
838 in the *Culex pipiens* complex. *Science*, 303, 1535-1538.
- 839 FONTANA-BRIA, L., SELFA, J., TUR, C. & FRAGO, E. 2017. Early exposure to predation  
840 risk carries over metamorphosis in two distantly related freshwater insects. *Ecological*  
841 *Entomology*, 42, 255-262.
- 842 FUTAMI, K., SONYE, G., AKWEYWA, P., KANEKO, S. & MINAKAWA, N. 2008.  
843 Diving behavior in *Anopheles gambiae* (Diptera: Culicidae): avoidance of a  
844 predacious wolf spider (Araneae: Lycosidae) in relation to life stage and water depth.  
845 *J Med Entomol*, 45, 1050-6.
- 846 GARDNER, A. M., HAMER, G. L., HINES, A. M., NEWMAN, C. M., WALKER, E. D. &  
847 RUIZ, M. O. 2012. Weather variability affects abundance of larval *Culex* (Diptera:  
848 Culicidae) in storm water catch basins in suburban Chicago. *Journal of medical*  
849 *entomology*, 49, 270-276.
- 850 GRILL, C. P. & JULIANO, S. A. 1996. Predicting species interactions based on behaviour:  
851 Predation and competition in container-dwelling mosquitoes. *Journal of Animal*  
852 *Ecology*, 65, 63-76.
- 853 GRISWOLD, M. W. & LOUNIBOS, L. P. 2005. Competitive Outcomes of Aquatic  
854 Container Diptera Depend on Predation and Resource Levels. *Annals of the*  
855 *Entomological Society of America*, 98, 673-681.



- 856 GUNATHILAKA, H. N., UPILIKA, H., UDAYANGA, N. W. B. A. & AMARASINGHE,  
857 D. 2019. Effect of Larval Nutritional Regimes on Morphometry and Vectorial  
858 Capacity of *Aedes aegypti* for Dengue Transmission. *BioMed Research International*,  
859 2019, 1-11.
- 860 HAMER, G. L., ANDERSON, T. K., DONOVAN, D. J., BRAUN, J. D., KREBS, B. L.,  
861 GARDNER, A. M., RUIZ, M. O., BROWN, W. M., KITRON, U. D., NEWMAN, C.  
862 M., GOLDBERG, T. L. & WALKER, E. D. 2014. Dispersal of adult culex  
863 mosquitoes in an urban west nile virus hotspot: a mark-capture study incorporating  
864 stable isotope enrichment of natural larval habitats. *PLoS neglected tropical diseases*,  
865 8, e2768-e2768.
- 866 HAMER, G. L., KITRON, U. D., BRAUN, J. D., LOSS, S. R., RUIZ, M. O., GOLDBERG,  
867 T. L. & WALKER, E. D. 2008. *Culex pipiens* (Diptera : Culicidae): A bridge vector  
868 of West Nile virus to humans. *Journal of Medical Entomology*, 45, 125-128.
- 869 HANCOCK, P. A., WIEBE, A., GLEAVE, K. A., BHATT, S., CAMERON, E., TRETT, A.,  
870 WEETMAN, D., SMITH, D. L., HEMINGWAY, J., COLEMAN, M., GETHING, P.  
871 W. & MOYES, C. L. 2018. Associated patterns of insecticide resistance in field  
872 populations of malaria vectors across Africa. *Proceedings of the National Academy of*  
873 *Sciences of the United States of America*, 115, 5938-5943.
- 874 HATALA, A. J., HARRINGTON, L. C. & DEGNER, E. C. 2018. Age and Body Size  
875 Influence Sperm Quantity in Male *Aedes albopictus* (Diptera: Culicidae) Mosquitoes.  
876 *Journal of Medical Entomology*, 55, 1051-1054.
- 877 HAWLEY, W. A. 1985. THE EFFECT OF LARVAL DENSITY ON ADULT LONGEVITY  
878 OF A MOSQUITO, *Aedes-SIERRENSIS* - EPIDEMIOLOGICAL  
879 CONSEQUENCES. *Journal of Animal Ecology*, 54, 955-964.
- 880 HEMINGWAY, J. & RANSON, H. 2000. Insecticide resistance in insect vectors of human  
881 disease. *Annual Review of Entomology*, 45, 371-391.
- 882 HERMANN, S. L. & LANDIS, D. A. 2017. Scaling up our understanding of non-  
883 consumptive effects in insect systems. *Current Opinion in Insect Science*, 20, 54-60.
- 884 HERMANN, S. L. & THALER, J. S. 2014. Prey perception of predation risk: volatile  
885 chemical cues mediate non-consumptive effects of a predator on a herbivorous insect.  
886 *Oecologia*, 176, 669-676.
- 887 HIGGINS, J. P. T., THOMAS, J., CHANDLER, J., CUMPSTON, M., LI, T., PAGE, M. J. &  
888 WELCH, V. A. 2020. Cochrane Handbook for Systematic Reviews of Interventions.  
889 Cochrane.
- 890 HIGGINS, J. P. T., THOMPSON, S. G., DEEKS, J. J. & ALTMAN, D. G. 2003. Measuring  
891 inconsistency in meta-analyses. *BMJ (Clinical research ed.)*, 327, 557-560.
- 892 HILL, C. A., KAFATOS, F. C., STANSFIELD, S. K. & COLLINS, F. H. 2005. Arthropod-  
893 borne diseases: vector control in the genomics era. *Nature Reviews Microbiology*, 3,  
894 262-268.
- 895 IRWIN, P. & PASKEWITZ, S. 2009. Investigation of fathead minnows (*Pimephales*  
896 *promelas*) as a biological control agent of *Culex* mosquitoes under laboratory and  
897 field conditions. *J Am Mosq Control Assoc*, 25, 301-9.
- 898 JANSSENS, L. & STOKS, R. 2012. How does a pesticide pulse increase vulnerability to  
899 predation? Combined effects on behavioral antipredator traits and escape swimming.  
900 *Aquat Toxicol*, 110-111, 91-8.
- 901 JENNIONS, M. D. & MOLLER, A. P. 2002. Publication bias in ecology and evolution: an  
902 empirical assessment using the 'trim and fill' method. *Biological Reviews*, 77, 211-  
903 222.

- 904 JOHNSON, B. J. & FONSECA, D. M. 2014. The effects of forced-egg retention on the  
905 blood-feeding behavior and reproductive potential of *Culex pipiens* (Diptera:  
906 Culicidae). *Journal of Insect Physiology*, 66, 53-58.
- 907 JOHNSON, B. J. & SUKHDEO, M. V. K. 2013. Drought-Induced Amplification of Local  
908 and Regional West Nile Virus Infection Rates in New Jersey. *Journal of Medical*  
909 *Entomology*, 50, 195-204.
- 910 JULIANO, S. A. 2009. Species Interactions Among Larval Mosquitoes: Context Dependence  
911 Across Habitat Gradients. *Annual Review of Entomology*, 54, 37-56.
- 912 KALIMUTHU, K., PANNEERSELVAM, D. C., CHOU, C., LIN, S.-M., TSENG, L.-C.,  
913 TSAI, K.-H., MURUGAN, K. & HWANG, J.-S. 2017. Predatory efficiency of the  
914 copepod *Megacyclops formosanus* and toxic effect of the red alga *Gracilaria firma*-  
915 synthesized silver nanoparticles against the dengue vector *Aedes aegypti*.  
916 *Hydrobiologia*, 785.
- 917 KALINOSKI, R. M. & DELONG, J. P. 2016. Beyond body mass: how prey traits improve  
918 predictions of functional response parameters. *Oecologia*, 180, 543-550.
- 919 KAY, B. H., NAM, V. S., VAN TIEN, T., YEN, N. T., PHONG, T. V., DIEP, V. T. B.,  
920 NINH, T. U., BEKTAS, A. & AASKOV, J. G. 2002. Control of *Aedes* vectors of  
921 dengue in three provinces of Vietnam by use of *Mesocyclops* (Copepoda) and  
922 community-based methods validated by entomologic, clinical, and serological  
923 surveillance. *American Journal of Tropical Medicine and Hygiene*, 66, 40-48.
- 924 KERSHENBAUM, A., SPENCER, M., BLAUSTEIN, L. & COHEN, J. E. 2012. Modelling  
925 evolutionarily stable strategies in oviposition site selection, with varying risks of  
926 predation and intraspecific competition. *Evolutionary Ecology*, 26, 955-974.
- 927 KLECKNER, C. A., HAWLEY, W. A., BRADSHAW, W. E., HOLZAPFEL, C. M. &  
928 FISHER, I. J. 1995. PROTANDRY IN *Aedes sierrensis* - THE  
929 SIGNIFICANCE OF TEMPORAL VARIATION IN FEMALE FECUNDITY.  
930 *Ecology*, 76, 1242-1250.
- 931 KNIGHT, T. M., CHASE, J. M., GOSS, C. W. & KNIGHT, J. J. 2004. Effects of  
932 interspecific competition, predation, and their interaction on survival and  
933 development time of immature *Anopheles quadrimaculatus*. *J Vector Ecol*, 29, 277-  
934 84.
- 935 KRAMER, L. D., STYER, L. M. & EBEL, G. D. 2008. A global perspective on the  
936 epidemiology of West Nile virus. *Annual Review of Entomology*, 53, 61-81.
- 937 KRAUS, J. M. & VONESH, J. R. 2010. Feedbacks between community assembly and habitat  
938 selection shape variation in local colonization. *Journal of Animal Ecology*, 79, 795-  
939 802.
- 940 KROL, L., GORSICH, E. E., HUNTING, E. R., GOVENDER, D., VAN BODEGOM, P. M.  
941 & SCHRAMA, M. 2019. Eutrophication governs predator-prey interactions and  
942 temperature effects in *Aedes aegypti* populations. *Parasites & Vectors*, 12.
- 943 KUMAR, R. & HWANG, J. S. 2006. Larvicidal efficiency of aquatic predators: A  
944 perspective for mosquito biocontrol. *Zoological Studies*, 45, 447-466.
- 945 KUMAR, R., MUHID, P., DAHMS, H. U., TSENG, L. C. & HWANG, J. S. 2008. Potential  
946 of three aquatic predators to control mosquitoes in the presence of alternative prey: a  
947 comparative experimental assessment. *Marine and Freshwater Research*, 59, 817-  
948 835.
- 949 KWEKA, E. J., ZHOU, G. F., GILBREATH, T. M., AFRANE, Y., NYINDO, M.,  
950 GITHEKO, A. K. & YAN, G. Y. 2011. Predation efficiency of *Anopheles gambiae*  
951 larvae by aquatic predators in western Kenya highlands. *Parasites & Vectors*, 4.

- 952 LAJEUNESSE, M. J. 2016. Facilitating systematic reviews, data extraction and meta-  
953 analysis with the metagear package for r. *Methods in Ecology and Evolution*, 7, 323-  
954 330.
- 955 LEISNHAM, P. T., SALA, L. M. & JULIANO, S. A. 2008. Geographic variation in adult  
956 survival and reproductive tactics of the mosquito *Aedes albopictus*. *Journal of*  
957 *Medical Entomology*, 45, 210-221.
- 958 LIMA, S. & DILL, L. 1990. Behavioral Decisions Made under the Risk of Predation: A  
959 Review and Prospectus. *Canadian Journal of Zoology-revue Canadienne De Zoologie*  
960 - *CAN J ZOOL*, 68, 619-640.
- 961 LIMA, S. L. 1998. Nonlethal Effects in the Ecology of Predator-Prey Interactions: What are  
962 the ecological effects of anti-predator decision-making? *BioScience*, 48, 25-34.
- 963 LIU, N. N. 2015. Insecticide Resistance in Mosquitoes: Impact, Mechanisms, and Research  
964 Directions. In: BERENBAUM, M. R. (ed.) *Annual Review of Entomology, Vol 60*.
- 965 LÜHKEN, R., STEINKE, S., LEGGEWIE, M., TANNICH, E., KRÜGER, A., BECKER, S.  
966 & KIEL, E. 2015. Physico-Chemical Characteristics of *Culex pipiens sensu lato* and  
967 *Culex torrentium* (Diptera: Culicidae) Breeding Sites in Germany. *Journal of Medical*  
968 *Entomology*, 52, 932-936.
- 969 LYIMO, E. O. & TAKKEN, W. 1993. EFFECTS OF ADULT BODY-SIZE ON  
970 FECUNDITY AND THE PRE-GRAVID RATE OF ANOPHELES-GAMBIAE  
971 FEMALES IN TANZANIA. *Medical and Veterinary Entomology*, 7, 328-332.
- 972 MARCANTONIO, M., RIZZOLI, A., METZ, M., ROSA, R., MARINI, G., CHADWICK, E.  
973 & NETELER, M. 2015. Identifying the Environmental Conditions Favouring West  
974 Nile Virus Outbreaks in Europe. *Plos One*, 10.
- 975 MARTEN, G. G. 1990. Elimination of *Aedes-Albopictus* from Tire Piles by Introducing  
976 *Macrocyclus-Albidus* (Copepoda, Cyclopidae). *Journal of the American Mosquito*  
977 *Control Association*, 6, 689-693.
- 978 MARTEN, G. G., CHE, W. Y. & BORDES, E. S. 1993. Compatibility of Cyclopoid  
979 Copepods with Mosquito Insecticides. *Journal of the American Mosquito Control*  
980 *Association*, 9, 150-154.
- 981 MARTEN, G. G., NGUYEN, M., MASON, B. J. & NGO, G. 2000a. Natural control of  
982 *Culex quinquefasciatus* larvae in residential ditches by the copepod *Macrocyclus*  
983 *albidus*. *Journal of Vector Ecology*, 25, 7-15.
- 984 MARTEN, G. G., NGUYEN, M. & NGO, G. 2000b. Copepod predation on *Anopheles*  
985 *quadrimaculatus* larvae in rice fields. *Journal of Vector Ecology*, 25, 1-6.
- 986 MARTEN, G. G. & REID, J. W. 2007. Cyclopoid copepods. *Journal of the American*  
987 *Mosquito Control Association*, 23, 65-92.
- 988 MCCAULEY, S. J., ROWE, L. & FORTIN, M. J. 2011. The deadly effects of "nonlethal"  
989 predators. *Ecology*, 92, 2043-8.
- 990 MERCER, D. R., WETTACH, G. R. & SMITH, J. L. 2005. Effects of larval density and  
991 predation by *Toxorhynchites amboinensis* on *Aedes polynesiensis* (Diptera :  
992 culicidae) developing in coconuts. *Journal of the American Mosquito Control*  
993 *Association*, 21, 425-431.
- 994 MICIELI, M. V., MARTI, G. & GARCÍA, J. J. 2002. Laboratory evaluation of *Mesocyclops*  
995 *annulatus* (Wierzejski, 1892) (Copepoda: Cyclopidea) as a predator of container-  
996 breeding mosquitoes in Argentina. *Mem Inst Oswaldo Cruz*, 97, 835-8.
- 997 MINAKAWA, N., FUTAMI, K., SONYE, G., AKWEYWA, P. & KANEKO, S. 2007.  
998 Predatory capacity of a shorefly, *Ochthera chalybescens*, on malaria vectors. *Malaria*  
999 *Journal*, 6, 104.

- 1000 MITTELBACH, G. G. 1981. FORAGING EFFICIENCY AND BODY SIZE - A STUDY  
1001 OF OPTIMAL DIET AND HABITAT USE BY BLUEGILLS. *Ecology*, 62, 1370-  
1002 1386.
- 1003 MOHER, D., LIBERATI, A., TETZLAFF, J. & ALTMAN, D. G. 2009. Preferred reporting  
1004 items for systematic reviews and meta-analyses: the PRISMA statement. *BMJ*, 339,  
1005 b2535.
- 1006 MOORE, S. M., BORER, E. T. & HOSSEINI, P. R. 2010. Predators indirectly control  
1007 vector-borne disease: linking predator-prey and host-pathogen models. *J R Soc*  
1008 *Interface*, 7, 161-76.
- 1009 NANNINI, M. A. & JULIANO, S. A. 1998. Effects of the Facultative Predator *Anopheles*  
1010 *barberi* on Population Performance of its Prey *Aedes triseriatus* (Diptera Culicidae).  
1011 *Annals of the Entomological Society of America*, 91, 33-42.
- 1012 NELMS, B. M., FECHTER-LEGGETT, E., CARROLL, B. D., MACEDO, P., KLUH, S. &  
1013 REISEN, W. K. 2013. Experimental and natural vertical transmission of West Nile  
1014 virus by California *Culex* (Diptera: Culicidae) mosquitoes. *J Med Entomol*, 50, 371-8.
- 1015 NELSON, E. H., MATTHEWS, C. E. & ROSENHEIM, J. A. 2004. PREDATORS REDUCE  
1016 PREY POPULATION GROWTH BY INDUCING CHANGES IN PREY  
1017 BEHAVIOR. *Ecology*, 85, 1853-1858.
- 1018 NIKOOKAR, S. H., FAZELI-DINAN, M., AZARI-HAMIDIAN, S., MOUSAVINASAB, S.  
1019 N., ARABI, M., ZIAPOUR, S. P., SHOJAEE, J. & ENAYATI, A. 2017. Species  
1020 composition and abundance of mosquito larvae in relation with their habitat  
1021 characteristics in Mazandaran Province, northern Iran. *Bulletin of Entomological*  
1022 *Research*, 107, 598-610.
- 1023 O'MEARA, G. F. 1979. Variable expressions of autogeny in three mosquito species.  
1024 *International Journal of Invertebrate Reproduction*, 1, 253-261.
- 1025 OHBA, S.-Y., OHTSUKA, M., SUNAHARA, T., SONODA, Y., KAWASHIMA, E. &  
1026 TAKAGI, M. 2012. Differential responses to predator cues between two mosquito  
1027 species breeding in different habitats. *Ecological Entomology*, 37, 410-418.
- 1028 OLIVER, J. & HOWARD, J. J. 2011. Fecundity of Wild-Caught Gravid *Culiseta morsitans*  
1029 (Diptera: Culicidae). *Journal of Medical Entomology*, 48, 196-201.
- 1030 OP DE BEECK, L., JANSSENS, L. & STOKS, R. 2016. Synthetic predator cues impair  
1031 immune function and make the biological pesticide Bti more lethal for vector  
1032 mosquitoes. *Ecological Applications*, 26, 355-366.
- 1033 ORR, B. K. & RESH, V. H. 1989. Experimental test of the influence of aquatic macrophyte  
1034 cover on the survival of *Anopheles* larvae. *J Am Mosq Control Assoc*, 5, 579-85.
- 1035 OWER, G. D. & JULIANO, S. A. 2019. The demographic and life-history costs of fear:  
1036 Trait-mediated effects of threat of predation on *Aedes triseriatus*. *Ecology and*  
1037 *Evolution*, 9, 3794-3806.
- 1038 PAULL, S. H., HORTON, D. E., ASHFAQ, M., RASTOGI, D., KRAMER, L. D.,  
1039 DIFFENBAUGH, N. S. & KILPATRICK, A. M. 2017. Drought and immunity  
1040 determine the intensity of West Nile virus epidemics and climate change impacts.  
1041 *Proceedings of the Royal Society B-Biological Sciences*, 284.
- 1042 PEACOR, S. D. & WERNER, E. E. 2001. The contribution of trait-mediated indirect effects  
1043 to the net effects of a predator. *Proceedings of the National Academy of Sciences*, 98,  
1044 3904.
- 1045 PETERS, R. H. 1983. Ingestion. In: BECK, E., BIRKS, H. J. B. & CONNOR, E. F. (eds.)  
1046 *The ecological implications of body size*. Cambridge: Cambridge University Press.
- 1047 PINTAR, M. R., BOHENEK, J. R., EVELAND, L. L. & RESETARITS, W. J. 2018.  
1048 Colonization across gradients of risk and reward: Nutrients and predators generate  
1049 species-specific responses among aquatic insects. *Functional Ecology*, 32, 1589-1598.



- 1050 PONLAWAT, A. & HARRINGTON, L. C. 2007. Age and body size influence male sperm  
1051 capacity of the dengue vector *Aedes aegypti* (Diptera : Culicidae). *Journal of Medical*  
1052 *Entomology*, 44, 422-426.
- 1053 PREISSER, E. L., BOLNICK, D. I. & BENARD, M. F. 2005. Scared to death? The effects of  
1054 intimidation and consumption in predator-prey interactions. *Ecology*, 86, 501-509.
- 1055 PYKE, G. H. 2008. Plague Minnow or Mosquito Fish? A Review of the Biology and Impacts  
1056 of Introduced *Gambusia* Species. *Annual Review of Ecology Evolution and*  
1057 *Systematics*, 39, 171-191.
- 1058 R CORE TEAM 2020. R: A language and environment for statistical computing. Vienna,  
1059 Austria: R Foundation for Statistical Computing.
- 1060 RAJENDRAN, R. & PRASAD, R. S. 1994. A laboratory study on the life cycle and feeding  
1061 behaviour of *Arrenurus madaraszi* (Acari: Arrenuridae) parasitizing *Anopheles*  
1062 mosquitoes. *Ann Trop Med Parasitol*, 88, 169-74.
- 1063 REINER, R. C., JR., PERKINS, T. A., BARKER, C. M., NIU, T., CHAVES, L. F., ELLIS,  
1064 A. M., GEORGE, D. B., LE MENACH, A., PULLIAM, J. R., BISANZIO, D.,  
1065 BUCKEE, C., CHIYAKA, C., CUMMINGS, D. A., GARCIA, A. J., GATTON, M.  
1066 L., GETHING, P. W., HARTLEY, D. M., JOHNSTON, G., KLEIN, E. Y.,  
1067 MICHAEL, E., LINDSAY, S. W., LLOYD, A. L., PIGOTT, D. M., REISEN, W. K.,  
1068 RUKTANONCHAI, N., SINGH, B. K., TATEM, A. J., KITRON, U., HAY, S. I.,  
1069 SCOTT, T. W. & SMITH, D. L. 2013. A systematic review of mathematical models  
1070 of mosquito-borne pathogen transmission: 1970-2010. *J R Soc Interface*, 10,  
1071 20120921.
- 1072 REISEN, W. K., MILBY, M. M. & BOCK, M. E. 1984. THE EFFECTS OF IMMATURE  
1073 STRESS ON SELECTED EVENTS IN THE LIFE-HISTORY OF CULEX-  
1074 TARSALIS. *Mosquito News*, 44, 385-395.
- 1075 REISKIND, M. H. & LOUNIBOS, L. P. 2009. Effects of intraspecific larval competition on  
1076 adult longevity in the mosquitoes *Aedes aegypti* and *Aedes albopictus*. *Medical and*  
1077 *Veterinary Entomology*, 23, 62-68.
- 1078 ROBERTS, D. 2012. Responses of three species of mosquito larvae to the presence of  
1079 predatory dragonfly and damselfly larvae. *Entomologia Experimentalis Et Applicata*,  
1080 145, 23-29.
- 1081 ROBERTS, D. 2018. Predator feeding vibrations encourage mosquito larvae to shorten their  
1082 development and so become smaller adults: Predator feeding vibrations. *Ecological*  
1083 *Entomology*.
- 1084 ROEHR, B. 2012. US hit by massive West Nile virus outbreak centred around Texas. *British*  
1085 *Medical Journal*, 345.
- 1086 ROHATGI, A. 2020. *WebPlotDigitizer* [Online]. Available:  
1087 <https://automeris.io/WebPlotDigitizer> [Accessed 07/14/2020].
- 1088 ROSEN, L. 1988. Further observations on the mechanism of vertical transmission of  
1089 flaviviruses by *Aedes* mosquitoes. *Am J Trop Med Hyg*, 39, 123-6.
- 1090 ROUX, O., DIABATE, A. & SIMARD, F. 2014. Divergence in threat sensitivity among  
1091 aquatic larvae of cryptic mosquito species. *Journal of Animal Ecology*, 83, 702-711.
- 1092 ROUX, O., VANTAUX, A., ROCHE, B., YAMEOGO, K. B., DABIRE, K. R., DIABATE,  
1093 A., SIMARD, F. & LEFEVRE, T. 2015. Evidence for carry-over effects of predator  
1094 exposure on pathogen transmission potential. *Proceedings of the Royal Society B-*  
1095 *Biological Sciences*, 282, 20152430.
- 1096 RUBBO, M. J., LANTERMAN, J. L., FALCO, R. C. & DANIELS, T. J. 2011. The Influence  
1097 of Amphibians on Mosquitoes in Seasonal Pools: Can Wetlands Protection Help to  
1098 Minimize Disease Risk? *Wetlands*, 31, 799-804.

- 1099 RUSSELL, B. M., MUIR, L. E., WEINSTEIN, P. & KAY, B. H. 1996. Surveillance of the  
1100 mosquito *Aedes aegypti* and its biocontrol with the copepod *Mesocyclops*  
1101 *aspericornis* in Australian wells and gold mines. *Medical and Veterinary Entomology*,  
1102 10, 155-160.
- 1103 SCHRAMA, M., GORSICH, E. E., HUNTING, E., BARMENTLO, S. H., BEECHLER, B.  
1104 & VAN BODEGOM, P. M. 2018. Eutrophication and predator presence overrule the  
1105 effects of temperature on mosquito survival and development. *PLoS Neglected*  
1106 *Tropical Diseases*, 3.
- 1107 SEALE, A. 1917. The Mosquito Fish, *Gambusia affinis* (Baird and Girard), in the Philippine  
1108 Islands. *Philippine Journal of Science*, 12, 177-187.
- 1109 SHAMAN, J., DAY, J. F. & STIEGLITZ, M. 2005. Drought-induced amplification and  
1110 epidemic transmission of West Nile Virus in southern Florida. *Journal of Medical*  
1111 *Entomology*, 42, 134-141.
- 1112 SHI, L. Y. & LIN, L. F. 2019. The trim-and-fill method for publication bias: practical  
1113 guidelines and recommendations based on a large database of meta-analyses.  
1114 *Medicine*, 98.
- 1115 SIH, A. 1986. ANTIPREDATOR RESPONSES AND THE PERCEPTION OF DANGER  
1116 BY MOSQUITO LARVAE. *Ecology*, 67, 434-441.
- 1117 SILBERBUSH, A., ABRAMSKY, Z. & TSURIM, I. 2015. Effects of fish cues on mosquito  
1118 larvae development. *Acta Tropica*, 150, 196-199.
- 1119 SILBERBUSH, A. & BLAUSTEIN, L. 2008. Oviposition habitat selection by a mosquito in  
1120 response to a predator: are predator-released kairomones air-borne cues? *J Vector*  
1121 *Ecol*, 33, 208-11.
- 1122 SILBERBUSH, A. & BLAUSTEIN, L. 2011. Mosquito females quantify risk of predation to  
1123 their progeny when selecting an oviposition site. *Functional Ecology*, 25, 1091-1095.
- 1124 SOGHIGIAN, J., VALSDOTTIR, L. R. & LIVDAHL, T. P. 2017. A parasite's modification  
1125 of host behavior reduces predation on its host. *Ecology and Evolution*, 7, 1453-1461.
- 1126 SOUMARE, M. K. F. & CILEK, J. E. 2011. The Effectiveness of *Mesocyclops Longisetus*  
1127 (Copepoda) for the Control of Container-Inhabiting Mosquitoes in Residential  
1128 Environments. *Journal of the American Mosquito Control Association*, 27, 376-383.
- 1129 SPENCER, M., BLAUSTEIN, L. & COHEN, J. E. 2002. OVIPOSITION HABITAT  
1130 SELECTION BY MOSQUITOES (*CULISETA LONGIAREOLATA*) AND  
1131 CONSEQUENCES FOR POPULATION SIZE. *Ecology*, 83, 669-679.
- 1132 STAATS, E. G., AGOSTA, S. J. & VONESH, J. R. 2016. Predator diversity reduces habitat  
1133 colonization by mosquitoes and midges. *Biology Letters*, 12, 20160580.
- 1134 STAV, G., BLAUSTEIN, L. & MARGALIT, Y. 2005. INDIVIDUAL AND INTERACTIVE  
1135 EFFECTS OF A PREDATOR AND CONTROPHIC SPECIES ON MOSQUITO  
1136 POPULATIONS. *Ecological Applications*, 15, 587-598.
- 1137 STERNE, J. A. C. & EGGER, M. 2001. Funnel plots for detecting bias in meta-analysis:  
1138 Guidelines on choice of axis. *Journal of Clinical Epidemiology*, 54, 1046-1055.
- 1139 STYER, L. M., MEOLA, M. A. & KRAMER, L. D. 2007. West Nile virus infection  
1140 decreases fecundity of *Culex tarsalis* females. *Journal of Medical Entomology*, 44,  
1141 1074-1085.
- 1142 SU, T. & MULLA, M. S. 1997. Physiological aspects of autogeny in *Culex tarsalis* (Diptera:  
1143 Culicidae): influences of sugar-feeding, mating, body weight, and wing length. *J*  
1144 *Vector Ecol*, 22, 115-21.
- 1145 SUBRAMANIAM, J., MURUGAN, K., PANNEERSELVAM, C., KOVENDAN, K.,  
1146 MADHIYAZHAGAN, P., KUMAR, P. M., DINESH, D., CHANDRAMOHAN, B.,  
1147 SURESH, U., NICOLETTI, M., HIGUCHI, A., HWANG, J. S., KUMAR, S.,  
1148 ALARFAJ, A. A., MUNUSAMY, M. A., MESSING, R. H. & BENELLI, G. 2015.

- 1149 Eco-friendly control of malaria and arbovirus vectors using the mosquitofish  
1150 *Gambusia affinis* and ultra-low dosages of Mimosops elengi-synthesized silver  
1151 nanoparticles: towards an integrative approach? *Environ Sci Pollut Res Int*, 22,  
1152 20067-83.
- 1153 SULESCO, T. M., TODERAS, L. G., USPENSKAIA, I. G. & TODERAS, I. K. 2015. Larval  
1154 Habitats Diversity and Distribution of the Mosquito (Diptera: Culicidae) Species in  
1155 the Republic of Moldova. *Journal of Medical Entomology*, 52, 1299-1308.
- 1156 THAPA, R., MIRSKY, S. B. & TULLY, K. L. 2018. Cover Crops Reduce Nitrate Leaching  
1157 in Agroecosystems: A Global Meta-Analysis. *Journal of Environmental Quality*, 47,  
1158 1400-1411.
- 1159 TIETZE, N. S., HESTER, P. G., SHAFFER, K. R., PRESCOTT, S. J. & SCHREIBER, E. T.  
1160 1994. INTEGRATED MANAGEMENT OF WASTE TIRE MOSQUITOS  
1161 UTILIZING MESOCYCLOPS-LONGISETUS (COPEPODA, CYCLOPIDAE),  
1162 BACILLUS-THURINGIENSIS VAR ISRAELENSIS, BACILLUS-SPHAERICUS,  
1163 AND METHOPRENE. *Journal of the American Mosquito Control Association*, 10,  
1164 363-373.
- 1165 TIETZE, N. S. & MULLA, M. S. 1990. Influence of tadpole shrimp, *Triops longicaudatus*  
1166 (Notostraca:Triopsidae), stocking rate on *Culex tarsalis* development in experimental  
1167 field microcosms. *J Am Mosq Control Assoc*, 6, 265-9.
- 1168 TOWNROE, S. & CALLAGHAN, A. 2014. British Container Breeding Mosquitoes: The  
1169 Impact of Urbanisation and Climate Change on Community Composition and  
1170 Phenology. *PLOS ONE*, 9, e95325.
- 1171 TSENG, M. 2007. Ascogregarine parasites as possible biocontrol agents of mosquitoes.  
1172 *Journal of the American Mosquito Control Association*, 23, 30-4.
- 1173 TSUNODA, T., FUKUCHI, A., NANBARA, S. & TAKAGI, M. 2010. Effect of body size  
1174 and sugar meals on oviposition of the yellow fever mosquito, *Aedes aegypti* (Diptera:  
1175 Culicidae). *J Vector Ecol*, 35, 56-60.
- 1176 UITERWAAL, S. F. & DELONG, J. P. 2020. Functional responses are maximized at  
1177 intermediate temperatures. *Ecology*.
- 1178 VAN UITREGT, V. O., HURST, T. P. & WILSON, R. S. 2012. Reduced size and starvation  
1179 resistance in adult mosquitoes, *Aedes notoscriptus*, exposed to predation cues as  
1180 larvae. *Journal of Animal Ecology*, 81, 108-115.
- 1181 VAN UITREGT, V. O., HURST, T. P. & WILSON, R. S. 2013. Greater costs of inducible  
1182 behavioural defences at cooler temperatures in larvae of the mosquito, *Aedes*  
1183 *notoscriptus*. *Evolutionary Ecology*, 27, 13-26.
- 1184 VERNA, T. N. 2015. Species Composition and Seasonal Distribution of Mosquito Larvae  
1185 (Diptera: Culicidae) in Southern New Jersey, Burlington County. *Journal of Medical*  
1186 *Entomology*, 52, 1165-1169.
- 1187 VERONESI, R., CARRIERI, M., MACCAGNANI, B., MAINI, S. & BELLINI, R. 2015.  
1188 *Macrocyclops Albidus* (Copepoda: Cyclopidae) for the Biocontrol of *Aedes*  
1189 *Albopictus* and *Culex Pipiens* in Italy. *Journal of the American Mosquito Control*  
1190 *Association*, 31, 32-43.
- 1191 VIECHTBAUER, W. 2010. Conducting Meta-Analyses in R with the metafor Package.  
1192 *Journal of Statistical Software*, 36, 1-48.
- 1193 VINCZE, E., SERESS, G., LAGISZ, M., DINGEMANSE, N. & SPRAU, P. 2017. Does  
1194 Urbanization Affect Predation of Bird Nests? A Meta-Analysis. *Frontiers in Ecology*  
1195 *and Evolution*, 5.
- 1196 VINOGRADOVA, E. B. 2000. *Culex pipiens pipiens* mosquitoes: taxonomy, distribution,  
1197 ecology, physiology, genetics, applied importance and control, Sofia, Bulgaria,  
1198 Pensoft.

- 1199 VONESH, J. R. & BLAUSTEIN, L. 2010. PREDATOR-INDUCED SHIFTS IN  
1200 MOSQUITO OVIPOSITION SITE SELECTION: A META-ANALYSIS and  
1201 IMPLICATIONS FOR VECTOR CONTROL. *Israel Journal of Ecology &*  
1202 *Evolution*, 56, 263-279.
- 1203 WALLACE, J. R. & MERRITT, R. W. 1999. Influence of microclimate, food, and predation  
1204 on *Anopheles quadrimaculatus* (Diptera : Culicidae) growth and development rates,  
1205 survivorship, and adult size in a Michigan pond. *Environmental Entomology*, 28, 233-  
1206 239.
- 1207 WEAVER, S. C. & REISEN, W. K. 2010. Present and future arboviral threats. *Antiviral*  
1208 *Research*, 85, 328-345.
- 1209 WORLD HEALTH ORGANIZATION (WHO). 2020. *Vector-borne diseases* [Online].  
1210 Available: <https://www.who.int/news-room/fact-sheets/detail/vector-borne-diseases>  
1211 [Accessed 02/07/2021].
- 1212 XUE, R. D., BARNARD, D. R. & MULLER, G. C. 2010. Effects of Body Size and  
1213 Nutritional Regimen on Survival in Adult *Aedes albopictus* (Diptera: Culicidae).  
1214 *Journal of Medical Entomology*, 47, 778-782.
- 1215 YANOVIK, S. P. 1999. Effects of *Mecistogaster* spp. (Odonata: Pseudostigmatidae) and  
1216 *Culex mollis* (Diptera: Culicidae) on Litter Decomposition in Neotropical Treehole  
1217 Microcosms. *The Florida Entomologist*, 82, 462-468.
- 1218 ZUHARAH, W. F., FADZLY, N. & LESTER, P. J. 2013. Lethal and sublethal impacts of  
1219 predaceous backswimmer *Anisops wakefieldi* (Hemiptera: Notonectidae) on the life-  
1220 history traits of the New Zealand mosquito *Culex pervigilans* (Diptera: Culicidae). *J*  
1221 *Med Entomol*, 50, 1014-24.
- 1222 ZUHARAH, W. F. & LESTER, P. J. 2010. The influence of aquatic predators on mosquito  
1223 abundance in animal drinking troughs in New Zealand. *Journal of Vector Ecology*,  
1224 35, 347-353.
- 1225
